# A multi-scale model reveals cellular and physiological mechanisms underlying hyperpolarisation-gated synaptic plasticity

Yubin Xie<sup>1,2,3‡</sup>, Marcel Kazmierczyk<sup>1</sup>, Bruce P. Graham<sup>4</sup>, Mayank B. Dutia<sup>1</sup>, Melanie I. Stefan<sup>1,5\*</sup>

\*For correspondence:

[melanie.stefan@ed.ac.uk](mailto:melanie.stefan@ed.ac.uk) (MIS)

Present address: <sup>‡</sup>Tri-Institutional Training Program in Computational Biology and Medicine, New York, USA

<sup>1</sup>Edinburgh Medical School: Biomedical Sciences, University of Edinburgh, UK; <sup>2</sup>Tri-Institutional Training Program in Computational Biology and Medicine, New York, USA; <sup>3</sup>School of Basic Medical Science, Zhejiang University School of Medicine, Hangzhou, China; <sup>4</sup>Division of Computing Science and Mathematics, University of Stirling, UK; <sup>5</sup>ZJU-UoE Institute, Zhejiang University School of Medicine, Haining, China

## Abstract

Neurons in the medial vestibular nucleus (MVN) display hyperpolarisation-gated synaptic plasticity, where inhibition believed to come from cerebellar cortical Purkinje cells can induce long-term potentiation (LTP) or long-term depression (LTD) of vestibular nerve afferent synapses. This phenomenon is thought to underlie the plasticity of the vestibulo-ocular reflex (VOR). The molecular and cellular mechanisms involved are largely unknown. Here we present a novel multi-scale computational model, which captures both electrophysiological and biochemical signalling at vestibular nerve synapses on proximal dendrites of the MVN neuron. We show that AMPA receptor phosphorylation at the vestibular synapse depends in complex ways on dendritic calcium influx, which is in turn shaped by patterns of post-synaptic hyperpolarisation and vestibular nerve stimulation. Hyperpolarisation-gated synaptic plasticity critically depends on the activation of LVA calcium channels and on the interplay between CaMKII and PP2B in dendrites of the post-synaptic MVN cell. The extent and direction of synaptic plasticity depend on the strength and duration of hyperpolarisation, and on the relative timing of hyperpolarisation and vestibular nerve stimulation. The multi-scale model thus enables us to explore in detail the interactions between electrophysiological activation and post-synaptic biochemical reaction systems. More generally, this model has the potential to address a wide range of questions about neural signal integration, post-synaptic biochemical reaction systems and plasticity.

## Introduction

Inhibition in neural circuits plays a fundamental role in modulating the activity and dynamic responsiveness of neurons (*Brock et al., 1952; Isaacson and Scanziani, 2011; Gidon and Segev, 2012; Bloss et al., 2016; Doron et al., 2017; Hull, 2017*). In cerebellum-dependent motor learning, inhibitory projections of Purkinje neurons in the cerebellar cortex to neurons in the vestibular nucleus (VN) and deep cerebellar nucleus (DCN), are essential for the induction of adaptive plasticity in extra-cerebellar motor pathways. Purkinje neurons integrate afferent signals from a wide range of sensory systems and inputs from inferior olive neurons, which encode 'errors' in ongoing motor

acts (*Ito, 2002; Yakusheva et al., 2007; Wulff et al., 2009*). While initial models proposed that motor memories were acquired and retained within the cerebellar cortex (*Ito, 1982*), much experimental and theoretical evidence now shows that motor learning involves the transfer of cortically-acquired motor memories to sub-cortical and extra-cerebellar structures for consolidation and retention (*Nagao and Kitazawa, 2003; Kassardjian et al., 2005; Shutoh et al., 2006; Porrill and Dean, 2007; Anzai et al., 2010; Menzies et al., 2010; Clopath et al., 2014; Carcaud et al., 2017*). Many studies have focussed on the neural circuitry underlying the horizontal vestibulo-ocular reflex (VOR) in particular. The VOR is the reflex by which the eyes move in the opposite direction to the head in order to maintain a stable image. The VOR is a robust and tractable experimental system in which to study cerebellum-dependent motor learning (*Blazquez et al., 2004; Boyden et al., 2004; du Lac et al., 1995; Miller et al., 2005; Broussard et al., 2011; Shin et al., 2014*). Errors in the gain of the VOR, where the evoked eye movements are larger or smaller than those required to precisely compensate for head movements, result in a slippage of the optical image on the retina and the loss of visual field stability. In response to 'retinal slip' errors encoded by inferior olive neurons, Purkinje cells in the cerebellar flocculus are believed to induce potentiation or depression of the vestibular nerve afferent synapses on medial VN (MVN) neurons, so increasing or decreasing the gain of the VOR appropriately to cancel retinal slip (*Raymond and Lisberger, 1998; Medina, 2010; Clopath et al., 2014; Carcaud et al., 2017*).

Recent studies have revealed a distinct form of hyperpolarisation-gated synaptic plasticity in MVN and DCN neurons, where inhibition presumed to be mediated by Purkinje cell synapses, induces long-term potentiation (LTP) or depression (LTD) of heterologous excitatory, glutamatergic synapses on these neurons (*Pugh and Raman, 2009; McElvain et al., 2010*). This represents therefore a plausible cellular mechanism by which cerebellar Purkinje cells may induce lasting changes in sub-cortical neural networks during the consolidation of a learned motor memory (*Kassardjian et al., 2005; Shutoh et al., 2006; Anzai et al., 2010*).

The cellular and molecular mechanisms that mediate hyperpolarisation-gated plasticity are largely unknown. In both DCN and MVN neurons, excitatory synaptic stimulation paired with a pattern of hyperpolarisation and release from hyperpolarisation, has been shown to induce LTP in the excitatory synapses (*Pugh and Raman, 2009; McElvain et al., 2010*). In DCN neurons the activation of low-threshold T type calcium channels (LVCa channels) upon the release of hyperpolarisation, is required for LTP (*Person and Raman, 2010*). T type calcium channels are also expressed in MVN neurons (*Serafin et al., 1991a,b; Him and Dutia, 2001; Engbers et al., 2013*), and interestingly these channels are significantly up-regulated during vestibular compensation, the behavioural recovery that takes place after vestibular deafferentation (*Him and Dutia, 2001; Straka et al., 2005; Menzies et al., 2010*).

Vestibular nerve and Purkinje cell synapses have recently been demonstrated to be closely apposed on dendrites of parvocellular MVN neurons, providing the anatomical substrate for a close spatial interaction between convergent inhibitory and excitatory synapses in these neurons (*Matsuno et al., 2016*). To investigate the cellular and molecular mechanisms that might underlie such interactions, we developed a novel multi-scale model. This model integrates the electrophysiological model of a Type B MVN neuron developed by *Quadroni and Knopfel (1994)* with biochemical models of postsynaptic calcium signalling and the subsequent activation of LTP- or LTD-inducing pathways, originally designed to model plasticity in hippocampal dendritic spines (*Stefan et al., 2008; Li et al., 2012; Mattioni and Le Novère, 2013*). The resulting multi-scale model allowed us to explore the molecular mechanisms invoked by the patterns of inhibition and excitatory stimulation that mediate hyperpolarisation-gated synaptic plasticity. We show that different types of synaptic activity are associated with different sources of calcium influx, with low-voltage activated calcium channels (LVACCs) becoming the dominant route of calcium entry during hyperpolarisation-gated synaptic plasticity. We also show that AMPA receptor phosphorylation (which we use as a readout for synaptic potentiation) shows a highly sigmoidal response to calcium, and that this response is mainly determined by the balance between kinase and phosphatase activity. We further show that

91 the extent and direction of hyperpolarisation-gated synaptic plasticity depend on the strength and  
92 duration of the hyperpolarising stimulus, as well as on the relative timing between hyperpolarisation  
93 and excitation. Our multi-scale model provides a novel in-silico test bed for further investigations  
94 into the interplay between inhibition, excitation and biochemical processes in synaptic plasticity.

## 95 Results

### 96 Biochemical Pathway Model of Synaptic Plasticity

97 We modelled the biochemical pathways underlying synaptic plasticity based on an earlier model  
98 by *Li et al. (2012)* (see Methods for details). A Systems Biology Graphical Notation (SBGN) diagram  
99 (*Le Novère et al., 2009*) describing the main components of our model is shown in Fig. 1B. Calcium  
100 enters through voltage-dependent calcium channels (VDCCs) and NMDA receptors (shown in grey,  
101 not explicitly included in the chemical model). Calcium then binds to and activates calmodulin  
102 (shown in yellow). Active (R-state) calmodulin can then activate either the calmodulin-dependent  
103 protein kinase II (CaMKII) pathway (shown in red) or the Protein phosphatase 2B (PP2B) (also known  
104 as calcineurin (CaN)) pathway (shown in blue). CaMKII is active when it is bound to calmodulin or  
105 autophosphorylated. Active CaMKII phosphorylates AMPA receptors, leading to enhanced AMPAR  
106 activity. In the PP2B pathway, calmodulin-bound PP2B dephosphorylates DARPP-32, and thereby  
107 releases PP1 from inhibition. Active PP1 can dephosphorylate AMPA receptors, counteracting the  
108 effect of CaMKII. PP1 also directly dephosphorylates CaMKII itself. The PKA pathway (shown in  
109 pink) can reduce dephosphorylation of AMPA receptors by activating DARPP-32. Taken together,  
110 the model captures the sequence of events leading from calcium influx to changes in AMPAR  
111 phosphorylation state.

### 112 AMPA receptor phosphorylation shows a complex dependency on calcium concen- 113 tration

114 In order to establish the usefulness of our biochemical model as a model of synaptic plasticity, we  
115 first examined the dependence of AMPA receptor phosphorylation on calcium concentration. To  
116 this end, we determined the effects of a step change in  $[Ca^{2+}]$  from baseline at equilibrium to a  
117 range of concentrations over the range  $4 \times 10^{-10}$  M to  $4 \times 10^{-7}$  M (Fig. 2). The time course of changes  
118 in the active molecular species in the system were observed over 1600s after the step change in  
119  $[Ca^{2+}]$ . As output, we computed the AMPAR phosphorylation ratio (phosphorylated AMPAR over  
120 total AMPAR).

121 As can be seen from Fig. 2A, the relationship between  $[Ca^{2+}]$  and AMPAR phosphorylation is  
122 complex. At very low calcium concentrations there is a baseline level of AMPAR phosphorylation  
123 of about 30%. Moderate increases in calcium concentrations (to the nanomolar range) lead to a  
124 decrease in AMPAR phosphorylation ratio. At  $[Ca^{2+}]$  of between 7 and  $7.5 \times 10^{-9}$  M however, there is  
125 a sharp increase in AMPAR phosphorylation ratio, so that at  $[Ca^{2+}]$  values of  $7.5 \times 10^{-9}$  M and higher  
126 about 50% of total AMPA receptors are phosphorylated at the end of the 1600s simulation period.

127 In order to identify the molecular determinants of the changes in AMPA receptor phosphoryla-  
128 tion, we examined the activation ratios (active over total concentrations) of other key molecular  
129 species in the system over the same range of  $Ca^{2+}$  concentrations (Fig. 2B). The activation patterns  
130 of kinases and phosphatases show sigmoidal responses to initial calcium concentration, with dif-  
131 ferent directions, incline, and transition concentrations. At sub-threshold  $Ca^{2+}$  concentrations, the  
132 dominant active form of CaMKII is calmodulin-bound (non-phosphorylated) CaMKII, whereas at  
133 higher  $Ca^{2+}$  phosphorylation becomes the main contributor to CaMKII activity (Fig. 2C). In order to  
134 highlight the bi-stable response pattern of CaMKII, we ran time courses at calcium concentrations  
135 just below and just above the threshold concentration at which the system switches (Fig. 2D).  
136 The bi-stable response is also present when calmodulin concentration is reduced, although the  
137 sharpness of the response and the calcium concentration at which the system changes between  
138 states vary (Fig. S1).

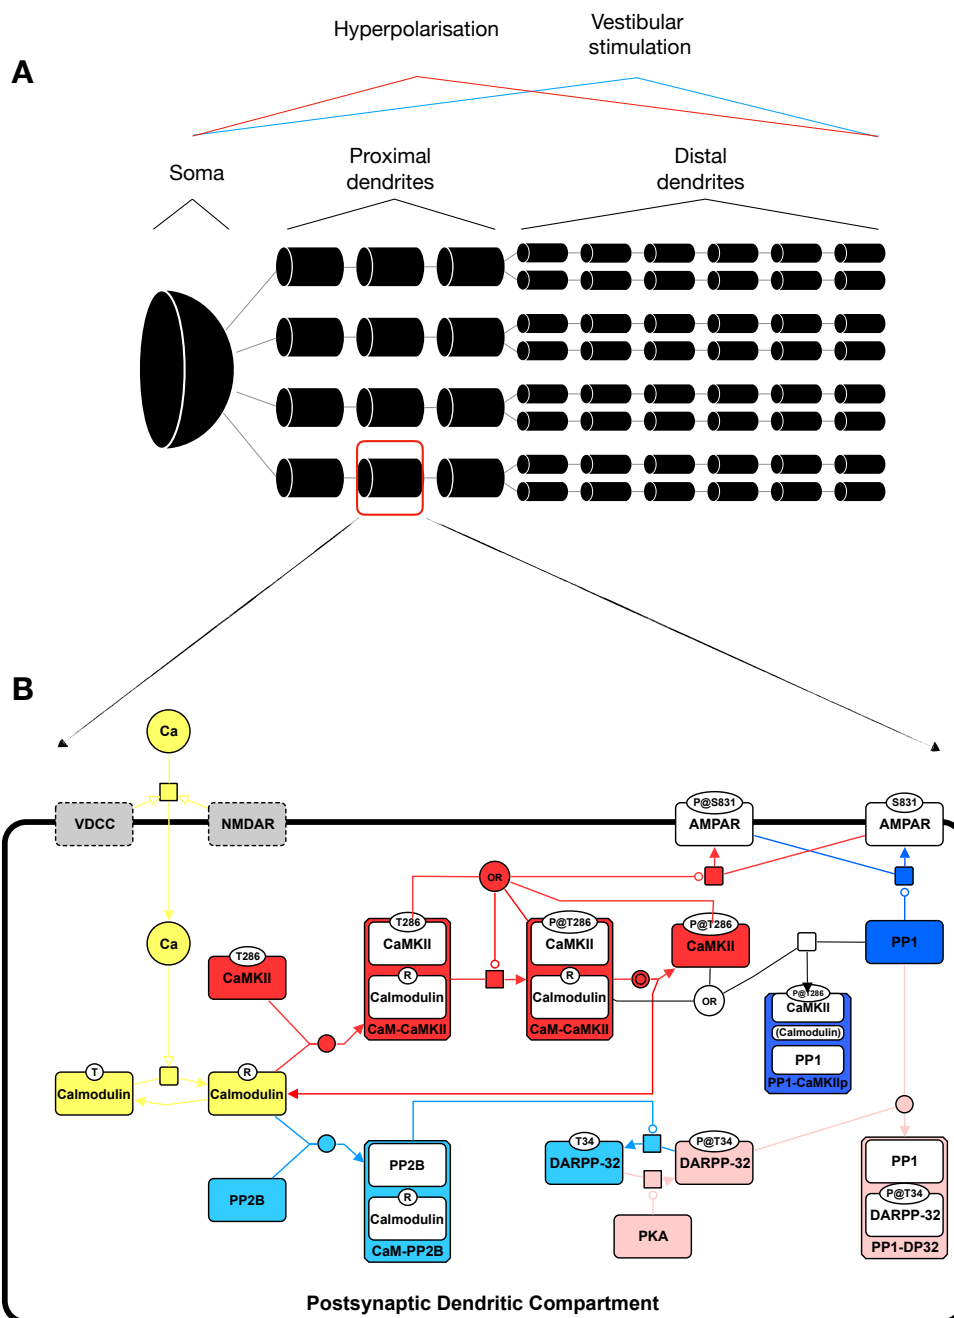

**Figure 1.** Simplified schematic of the models used in this work. **A.** NEURON model with 61 electrical compartments, representing the soma, proximal dendrites, and distal dendrites. **B.** Chemical model with the key molecular species and reactions that underlie calcium-dependent synaptic plasticity.

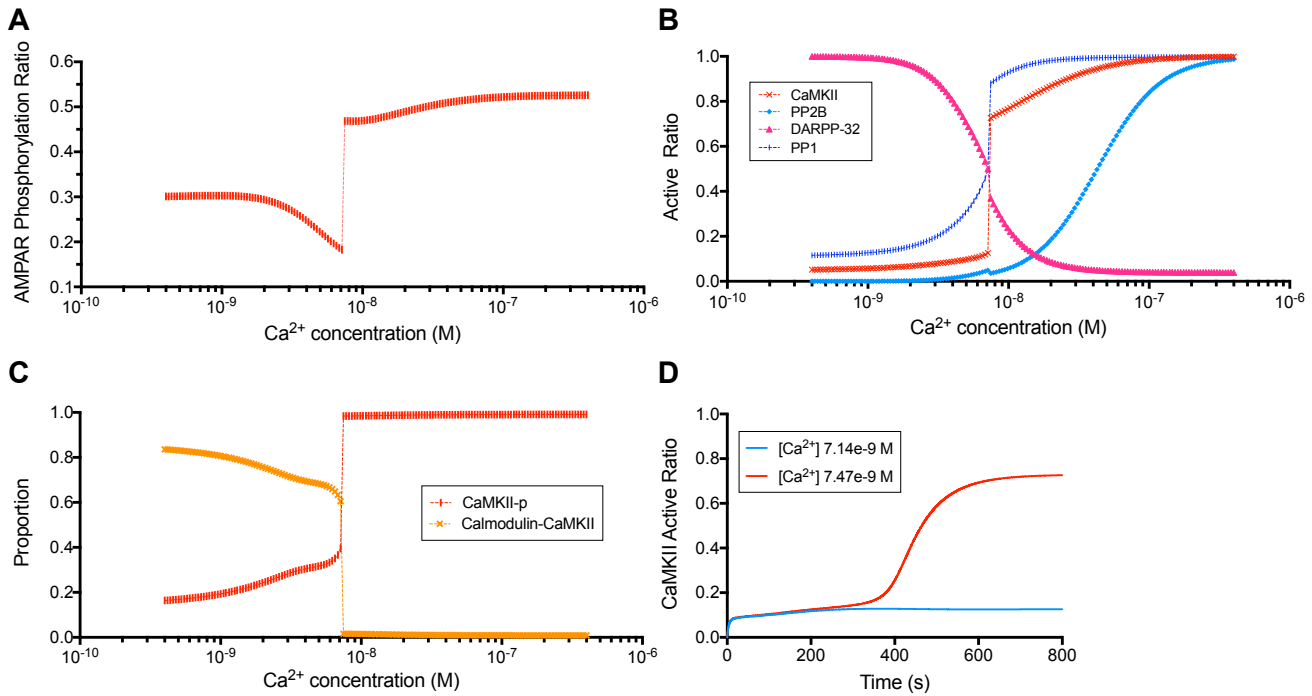

**Figure 2.** Dependence of AMPAR phosphorylation and relative activation ratios of key molecular species on [Ca<sup>2+</sup>]. **A.** AMPAR phosphorylation ratio (phosphorylated AMPAR over total AMPAR) as a function of [Ca<sup>2+</sup>] over the range  $4 \times 10^{-10}$  M to  $4 \times 10^{-7}$  M. For each data point the biochemical model was re-initialised and after reaching equilibrium the intracellular [Ca<sup>2+</sup>] was stepped up to successively higher values (logarithmic scan of [Ca<sup>2+</sup>] range, 151 simulations). Each simulation was run for 1600 s, to steady state. Note the initial dephosphorylation of AMPA receptors with increasing [Ca<sup>2+</sup>], which is followed by a switch to a large sustained increase in AMPAR phosphorylation when [Ca<sup>2+</sup>] is increased above a threshold value for inducing long-term potentiation. **B.** Relative activation ratios (concentration of active molecules divided by total molecules) for CaMKII, PP2B, DARPP-32, and PP1 as a function of [Ca<sup>2+</sup>]. **C.** The proportion of the two active CaMKII forms: CaMKII-p (phosphorylated CaMKII) and calmodulin-bound (non-phosphorylated) CaMKII as a function of [Ca<sup>2+</sup>]. **D.** Time-course of activation of CaMKII over a period of 800 s, at two values of [Ca<sup>2+</sup>] on either side of the threshold concentration.

139 Since dephosphorylation of AMPA receptors is associated with LTD and AMPA receptor phospho-  
140 rylation with LTP, this behaviour of the biochemical system is consistent with the widely accepted  
141 model by which a moderate increase in  $[Ca^{2+}]$  will result in the depression of excitatory synapses,  
142 and a greater increase will result in their potentiation (Lisman, 1989; Malenka, 1994). We therefore  
143 used AMPA receptor phosphorylation ratio as a readout in our subsequent simulation experiments.

144 We next implemented the biochemical model within dendritic compartments of the MVN neuron,  
145 in order to study LTD and LTP of the excitatory vestibular nerve synapses that impinge upon the  
146 MVN neuron.

### 147 **Dendritic $[Ca^{2+}]$ profiles induced by vestibular synaptic stimulation with and with-** 148 **out hyperpolarisation**

149 We next studied how different stimulation protocols affect calcium dynamics in the proximal  
150 dendrites of the MVN neuron. For this, we used a multi-compartmental electrophysiological model  
151 of an MVN Type B neuron (Quadroni and Knopfel, 1994; Graham et al., 2009) in the NEURON  
152 software (Carnevale and Hines, 2006) (Fig 1 A). We stimulated each neuronal compartment in the  
153 model by either activating the excitatory vestibular synapses (Vestibular Stimulation protocol, "VS")  
154 or by activating the excitatory vestibular synapses together with hyperpolarisation of the cell  
155 membrane (Hyperpolarisation + Vestibular Stimulation protocol, "H+VS").

156 The results are shown in Fig. 3. The MVN neuron had a resting firing rate of around 24 Hz before  
157 vestibular stimulation, similar to the resting activity observed in experimental studies (Johnston  
158 et al., 1994; McElvain et al., 2010) (Fig. 3 A). Stimulation of the vestibular nerve input at 100 Hz  
159 ("VS protocol") evoked a firing rate of around 56 Hz, similar to the response evoked by vestibular  
160 nerve stimulation in the study of McElvain et al. (2010). There was a significant increase in  $[Ca^{2+}]$   
161 for the duration of the vestibular nerve stimulation, with the result that the total dendritic  $[Ca^{2+}]$   
162 was elevated to 2.3 times the baseline level (Fig. 3 B, D). Analysis of the individual dendritic ion  
163 channel currents (Fig. 3C) showed that at rest, the  $Ca^{2+}$  influx was mediated predominantly by  
164 LVA  $Ca^{2+}$  channels and by HVA  $Ca^{2+}$  channels that were activated during each action potential. By  
165 contrast during VS stimulation, the activation of synaptic NMDA channels in addition to the LVA and  
166 HVA channels, led to a significant increase of dendritic  $Ca^{2+}$  influx for the duration of the vestibular  
167 stimulation (Fig. 3C, D).

168 As shown in Fig. 3B, in response to the H+VS stimulation protocol there was an initial hyperpo-  
169 larisation of around 25 mV over the first 250 ms, which was followed by a rebound depolarisation  
170 and increase in firing rate upon the release of inhibition. Dendritic  $[Ca^{2+}]$  decreased initially during  
171 the period of inhibitory stimulation, but the large influx of  $[Ca^{2+}]$  during the rebound depolarisation  
172 resulted in the net dendritic  $[Ca^{2+}]$  being elevated to a level 3.64 times the baseline (Fig. 3D). The  
173  $Ca^{2+}$  influx from LVA channels activated upon the release of inhibition was the predominant source  
174 of dendritic  $Ca^{2+}$  during the H+VS stimulation. Together with the NMDA receptor mediated influx,  
175 this led to the highly elevated levels of dendritic  $[Ca^{2+}]$  (Fig. 3D).

176 Together, these results demonstrate that during vestibular nerve stimulation alone (VS protocol)  
177 the activation of synaptic NMDA receptors causes a moderate elevation of dendritic  $[Ca^{2+}]$ , while  
178 pairing hyperpolarisation with vestibular nerve stimulation in the H+VS protocol led to the elevation  
179 of dendritic  $[Ca^{2+}]$  to a substantially higher level. Thus, postsynaptic hyperpolarisation has a marked  
180 effect on dendritic  $[Ca^{2+}]$  influx, when the activation of LVA channels coincides with activation of the  
181 synaptic NMDA receptors.

### 182 **Multi-scale modelling reveals molecular pathways activated in response to vestibular** 183 **synaptic stimulation with and without hyperpolarisation**

184 We next examined the effect of calcium influx under the VS and H+VS protocols on downstream  
185 signalling pathways. In order to do this, we combined the NEURON and COPASI models described  
186 above into one multi-scale modelling pipeline. Specifically, we first used the NEURON model to  
187 simulate the VS and H+VS protocols, as described above. The readout from the neuron model

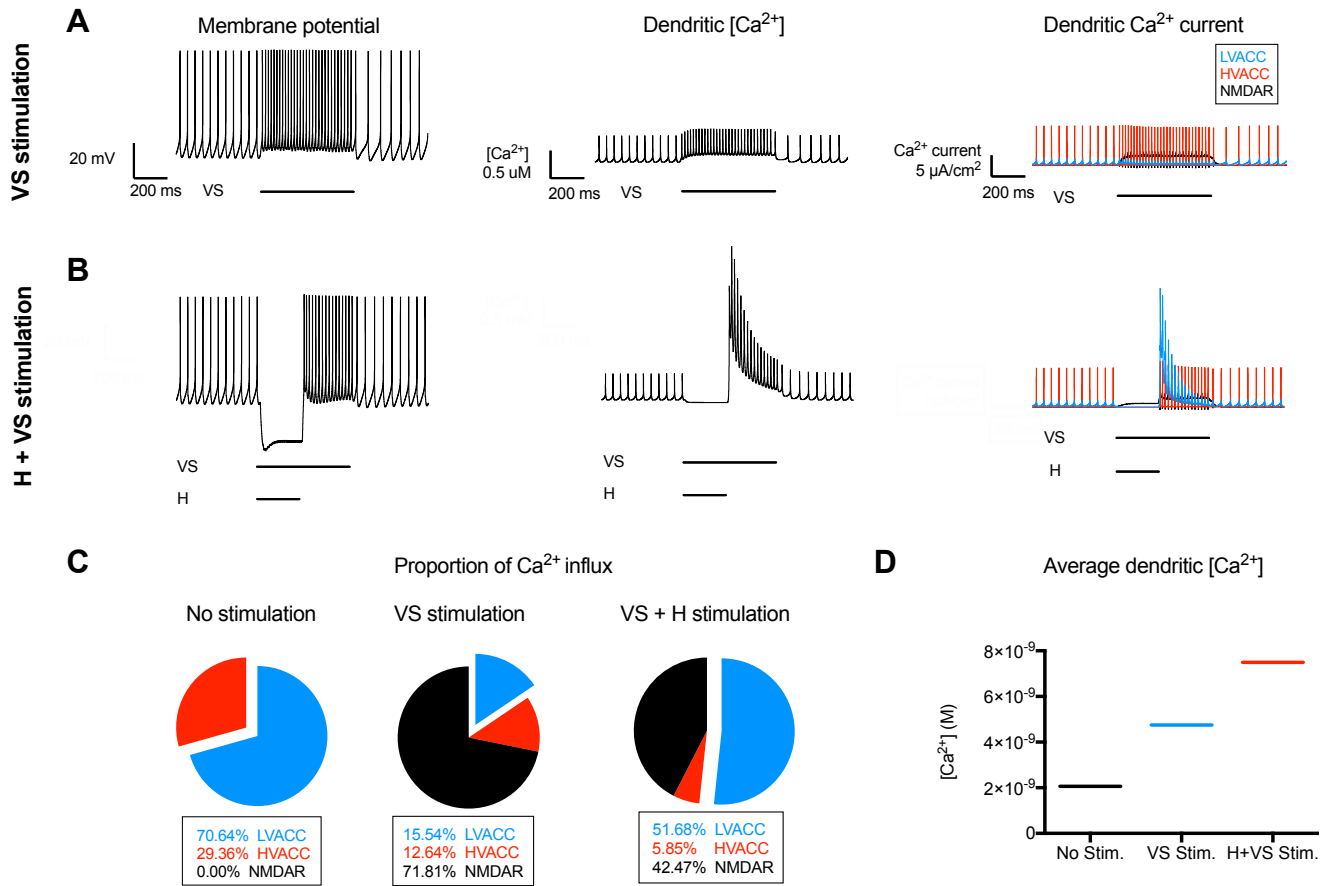

**Figure 3.** Effects of VS and H+VS stimulus protocols on membrane potential and  $[Ca^{2+}]$  in a dendritic compartment of a Type B MVN cell. The membrane potential and action potential firing (left panel), total  $[Ca^{2+}]$  profiles (middle panel) and  $Ca^{2+}$  currents dynamics (right panel) in a single dendritic compartment of a NEURON model of a Type B MVN cell in response to vestibular nerve synapse stimulation at 100 Hz for 550 ms (VS protocol, **A**), and to vestibular stimulation combined with membrane hyperpolarisation for the first 250 ms of the stimulation period (H+VS protocol, **B**). **C**. the contribution of low-voltage activated calcium channels (LVACC), high-voltage activated calcium channels (HVACC) and NMDA receptor channels (NMDAR) to the changes in  $[Ca^{2+}]$  observed in the two stimulus protocols. Note the activation of HVACC during action potential firing, and the activation of synaptic NMDAR during VS stimulation. During H+VS stimulation, the release of the membrane hyperpolarisation results in a large activation of LVACC  $Ca^{2+}$  currents. **D**. Total dendritic  $[Ca^{2+}]$  averaged over the simulation period for the VS and H+VS stimulus protocols after scaling due to  $Ca^{2+}$  buffering effect (Fig. 11).

188 was a profile of intracellular calcium concentration over time. These profiles were then used as  
189 an input for a COPASI simulation of the calcium-dependent biochemical signalling pathways as  
190 described earlier. The interface between NEURON and COPASI was coded in Python and included  
191 two steps to facilitate a smooth conversion from electrical to biochemical model. First, we binned  
192 time steps from the NEURON model into larger time intervals, because biochemical simulations  
193 happen at a larger time scale and therefore do not require the same temporal resolution as  
194 electrophysiological models. Second, we applied a scaling factor in order to account for the fact that  
195 a portion of the calcium entering the cell will immediately bind to intracellular calcium buffers not  
196 explicitly represented in our biochemical model, and the effective calcium concentration available  
197 for calmodulin binding will therefore be smaller than the overall calcium concentration.

198 The outcomes of the multi-scale simulations are shown in Fig. 4. The dendritic  $[Ca^{2+}]$  profiles  
199 induced by the VS and H+VS stimulation protocols had substantially different effects on the key  
200 components of the biochemical model and the resultant phosphorylation of AMPA receptors. In  
201 particular the moderate rise of dendritic  $[Ca^{2+}]$  induced by the VS stimulation led to a modest  
202 activation of CaMKII and PP2B (Fig. 4 A), and a sustained decrease in the level of AMPA receptor  
203 phosphorylation over the course of the simulation (Fig. 4C). By contrast, the greater rise in  $[Ca^{2+}]$   
204 induced by the H+VS stimulation led to a marked activation of PP2B and CaMKII (Fig. 4B). Following  
205 an initial decrease in active AMPA receptor phosphorylation ratio, the H+VS stimulation protocol  
206 induced a large sustained increase in AMPA receptor phosphorylation level (Fig. 4D). Presumably  
207 the rise in  $[Ca^{2+}]$  evoked by the H+VS protocol was greater than that required to trigger auto-  
208 phosphorylation of CaMKII and the consequent high level of phosphorylation of the AMPA receptors,  
209 while in the VS protocol the modest rise in  $[Ca^{2+}]$  was insufficient to trigger this "switch-like"  
210 behaviour. The VS and H+VS protocols thus had opposite effects on synaptic AMPA receptors. This  
211 is consistent with the experimental observation of synaptic LTD and LTP in the study of *McElvain*  
212 *et al. (2010)*.

213 Taken together, vestibular stimulation following hyperpolarisation results in markedly increased  
214 calcium influx, activation of calcium-dependent kinases over phosphatases and a resulting net  
215 increase in AMPA receptor phosphorylation. In contrast, vestibular stimulation alone results in a  
216 more moderate calcium influx, a different balance of kinase and phosphatase activity, and a net  
217 dephosphorylation of AMPA receptors.

### 218 **LVA channel density determines dendritic calcium dynamics and hyperpolarisation-** 219 **gated synaptic plasticity**

220 To examine further the role of MVN LVA channels in mediating hyperpolarisation-gated plasticity, we  
221 explored the relationship between LVA channel density, the post-hyperpolarisation rebound calcium  
222 influx and effects on synaptic AMPAR phosphorylation. We compared the effects of the VS and H+VS  
223 protocols on AMPAR phosphorylation ratio in a "Type B<sub>high\_LVA</sub> neuron" model, in which the dendritic  
224 LVA channel density is significantly higher than the normal Type B neuron (*Quadroni and Knopfel,*  
225 *1994*) (Table 2), and in the hypothetical "Type B<sub>low\_LVA</sub> neuron" in which the LVA channel density was  
226 reduced to 50 % of that in the normal Type B neuron (Table 2). As expected, in the Type B<sub>high\_LVA</sub>  
227 neuron the post-hyperpolarisation rebound firing and the dendritic  $Ca^{2+}$  influx were significantly  
228 greater than in the normal Type B neuron, reflecting the higher density of dendritic LVA channels in  
229 this cell type. By contrast the Type B<sub>low\_LVA</sub> neuron showed a much smaller rebound depolarisation  
230 and reduced dendritic  $Ca^{2+}$  influx than the normal Type B neuron (Fig. 5). As shown in Fig. 6, the  
231 effects of the VS and H+VS protocols on AMPAR phosphorylation levels in these neuron types were  
232 also markedly different. In the Type B<sub>high\_LVA</sub> neuron, the VS stimulation protocol caused a slightly  
233 more pronounced decline in AMPA receptor phosphorylation level than in the "normal" Type B  
234 neuron. The H+VS stimulation protocol evoked a larger, more rapid increase in AMPA receptor  
235 phosphorylation (Fig. 6). By contrast in the Type B<sub>low\_LVA</sub> neuron VS stimulation caused a slower,  
236 less marked decrease in AMPAR phosphorylation levels than in the normal Type B neuron, while  
237 the H+VS stimulation did not result in increased AMPAR phosphorylation, instead producing a slight



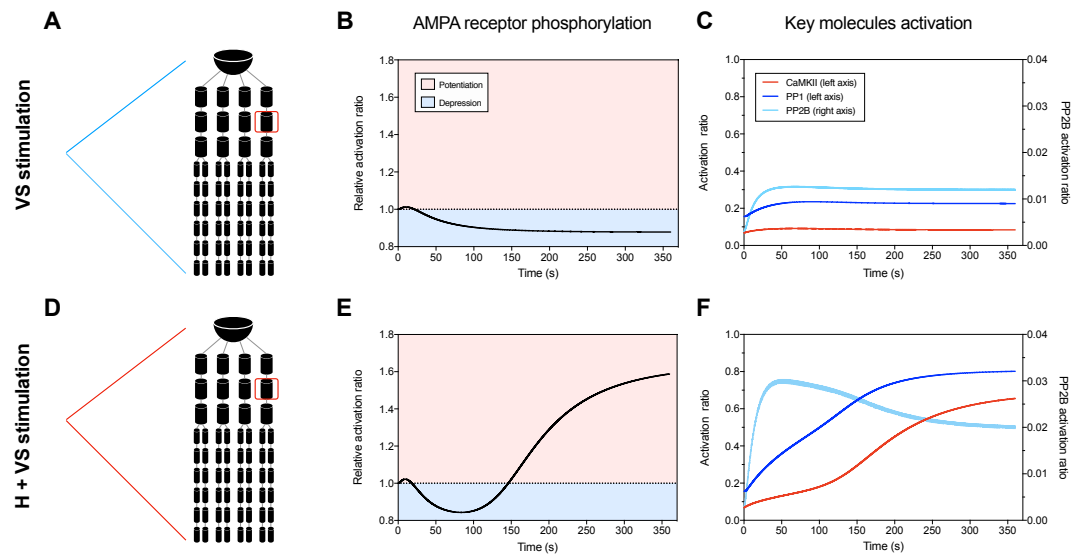

**Figure 4.** Time-course of activation of key molecular species and AMPAR phosphorylation in response to VS and H+VS stimulation. Left part is the changes in active ratios of CaMKII, PP1 and PP2B in response to the VS stimulation protocol (**A**) and H+VS stimulation (**B**). Right part corresponding changes in AMPAR phosphorylation in response to the VS stimulation protocol (**A**) and H+VS stimulation protocol (**B**). Note that the VS protocol evokes a moderate activation of the key molecular species and results in a net de-phosphorylation of AMPAR over the period of stimulation, while the H+VS protocol induces a marked activation of PP1 and CaMKII, and results in a sustained phosphorylation of AMPA receptors.

238 decline.

239 Together, these results indicate that the density of LVA channels is a major determinant of  
 240 dendritic calcium dynamics and hyperpolarisation-gated synaptic plasticity.

### 241 **Hyperpolarisation-gated synaptic plasticity depends on the balance of kinases and** 242 **phosphatases**

243 Given the importance of dendritic calcium influx and its biochemical effects in regulating AMPA  
 244 receptor phosphorylation levels, we next examined the effects of varying the relative concentrations  
 245 of the two key molecules CaMKII and PP2B, on the response of the normal MVN Type B neuron  
 246 to the H+VS stimulation protocol (Fig. 7). We ran a total of 9 simulations where we reduced the  
 247 intracellular concentrations of CaMKII and PP2B to 66% and 33% of the base model independently  
 248 and in combination, to explore the effects of changing the absolute levels of these molecules as well  
 249 as their relative ratios. As shown in Fig. 7, total CaMKII concentration is the main determinant of  
 250 AMPAR phosphorylation level, although the balance between kinase and phosphatase concentration  
 251 also plays a role. At normally high CaMKII concentrations (Fig. 7A), there is always an increase in  
 252 AMPAR phosphorylation, though that increase is more pronounced when PP2B concentrations is  
 253 reduced. Interestingly, when CaMKII concentration is slightly reduced (Fig. 7B), this can produce  
 254 either an increase or a decrease in AMPAR phosphorylation, depending on PP2B concentration. At  
 255 low CaMKII levels (Fig. 7C), the kinase activity is no longer enough to induce a net increase in AMPAR  
 256 phosphorylation at normal or 66% of normal levels of PP2B. Only if PP2B concentration is also  
 257 lowered to 33% of its base model concentration can we see an increase in AMPAR phosphorylation,  
 258 but this increase is slow and moderate in scale.

259 These findings demonstrate the importance of CaMKII as a key molecular species in mediating  
 260 hyperpolarisation-gated plasticity, and show that the net effectiveness of the H+VS stimulation  
 261 protocol is critically dependent on the balance between the kinase and its antagonist phosphatase  
 262 PP2B.

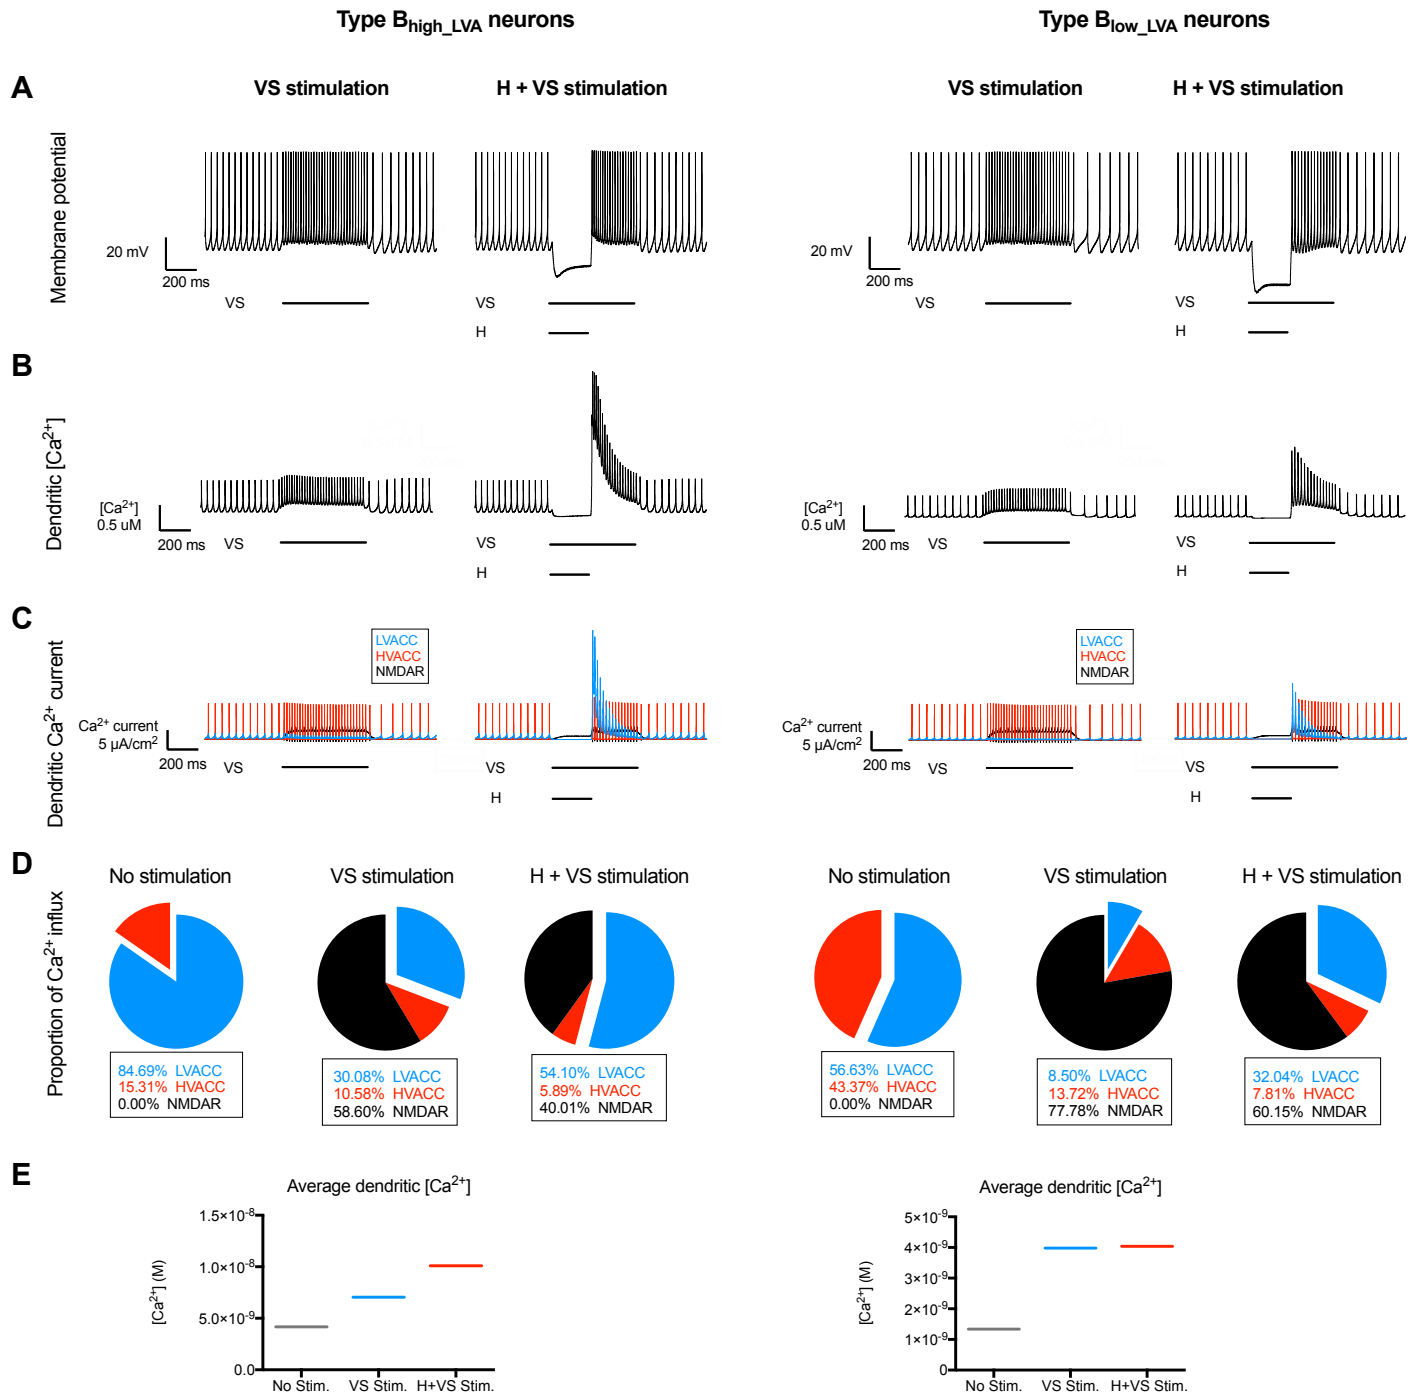

**Figure 5.** Effects of VS and H+VS stimulus protocols on membrane potential and [Ca<sup>2+</sup>] in a dendritic compartment of a Type B<sub>high\_LVA</sub> or Type B<sub>low\_LVA</sub> MVN cell. The same stimulation protocols and analysis as in Fig. 3 are applied here. In the Type B<sub>high\_LVA</sub> neuron the post-hyperpolarisation rebound firing and the dendritic Ca<sup>2+</sup> influx were significantly greater than in the normal Type B neuron, while the Type B<sub>low\_LVA</sub> neuron showed a much smaller rebound depolarisation and reduced dendritic Ca<sup>2+</sup> influx than the normal Type B neuron. Note that because the types of neurons differ in LVA density, they have different basal calcium concentrations, and a direct comparison of absolute values between types of neurons is therefore difficult.

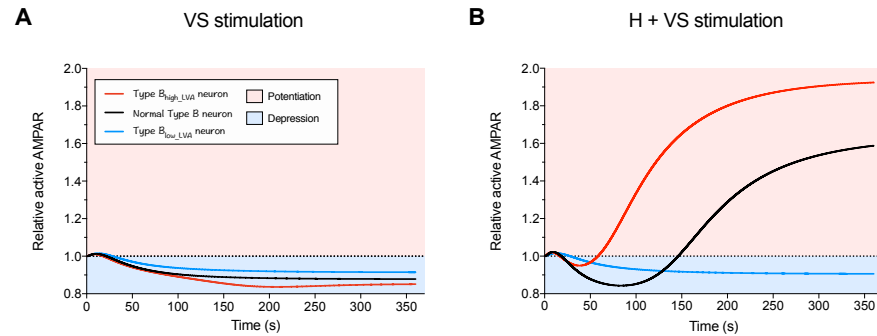

**Figure 6.** Effects of VS and H+VS stimulation protocols on AMPAR phosphorylation depend on LVA channel expression in MVN neurons. Effects of the VS (**A**) and H+VS (**B**) stimulation protocols on AMPAR phosphorylation in a normal Type B MVN neuron, a Type B neuron expressing a high level of LVACC (Type B<sub>high\_LVA</sub> cell), and a hypothetical class of MVN neuron with low expression of LVACC (Type B<sub>low\_LVA</sub> cell).

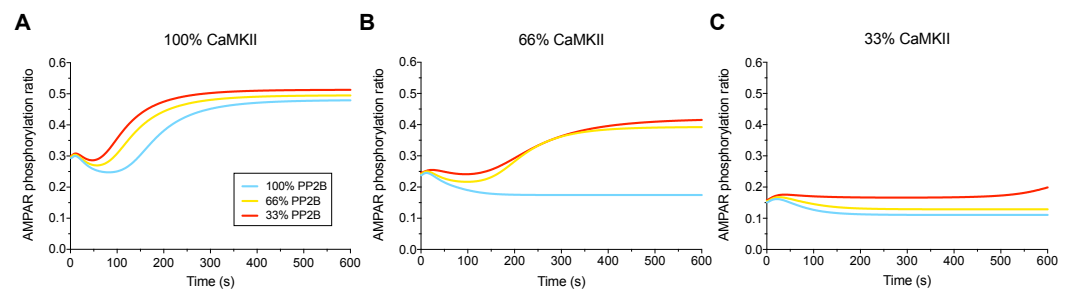

**Figure 7.** Dependence of AMPAR phosphorylation response on CaMKII, PP1 and PP2B levels. Effects of varying the concentrations of CaMKII and PP2B in a normal Type B MVN neuron on the phosphorylation of AMPAR in response to the H+VS stimulation protocol. Simulations were run where CaMKII and PP2B concentrations were set to 100%, 66% and 33% of those typically found in a neuron.

## 263 **Hyperpolarisation-gated plasticity depends on the strength, duration, and relative** 264 **timing of the hyperpolarising stimulus**

265 Finally we explored what features of the hyperpolarising stimulus are important for determining  
266 the strength and direction of synaptic plasticity. We investigated this by simulating repeated  
267 combinations of inhibitory stimuli for 600 s each. Across simulations, we varied either the strength,  
268 duration, or relative timing of the hyperpolarising stimulus (corresponding to 600, 600 and 400  
269 inhibition/excitation pairs in 600 s), while keeping the other two parameters and the parameters  
270 governing the excitatory stimulus constant.

271 We first varied the amplitude of the hyperpolarising stimulus. In order to do this, we used our  
272 multi-scale model to simulate a H+VS protocol in normal Type B MVN neurons with hyperpolarisation  
273 strengths ranging from 0 pA to 600 pA (Fig. 8A). In all cases, each excitatory pulse lasted  
274 for 550 ms. Each hyperpolarising stimulus started at the same time as the excitatory stimulus and  
275 lasted for 250 ms.

276 As shown in Fig. 8B, both dendritic  $\text{Ca}^{2+}$  concentration and AMPA receptor phosphorylation  
277 displayed a complex dependency on the strength of the hyperpolarising stimulus. Small amounts  
278 of membrane hyperpolarisation caused essentially no change (or a small decrease) in calcium  
279 levels, and no change in AMPA receptor phosphorylation. Intermediate hyperpolarisation strengths  
280 resulted in a moderate increase in  $[\text{Ca}^{2+}]$  and a decrease in AMPA receptor phosphorylation. Once  
281 hyperpolarisation strength reaches a threshold of 450 pA, the system switches: CaMKII reaches  
282 sustained levels of activation, resulting in an overall increase of AMPA receptor phosphorylation.  
283 (Fig. 8D).

284 Next, we varied the duration of the hyperpolarising stimulus. In order to do this, we used our  
285 multi-scale model to simulate a H+VS protocol in normal Type B MVN neurons with hyperpolarisation  
286 duration ranging from 0 ms to 550 ms (Fig. 9A). In all cases, we used a hyperpolarising stimulus  
287 of 475 pA, which started at the same time as a 550 ms excitatory stimulus.

288 The dendritic  $[\text{Ca}^{2+}]$  response and AMPA receptor phosphorylation showed a complex dependence  
289 on the duration of the H stimulus (Fig. 9B). A short period of hyperpolarisation (less than  
290 80 ms) leads to a small increase of  $[\text{Ca}^{2+}]$  in the rebound and no change or a decrease in AMPA  
291 receptor phosphorylation. With very long periods of hyperpolarisation that overlap with the excitatory  
292 stimulation, the net Ca concentration can even be lower than that without stimulation. This will  
293 also lead to a decrease in AMPAR activation. At hyperpolarisation durations in between, there is  
294 a robust rise in calcium levels, and a stable "up" state is reached at which almost half of all AMPA  
295 receptors are phosphorylated (Fig. 9D).

296 Finally we varied the timing between hyperpolarising and depolarising stimuli. In order to do  
297 this, we used our multi-scale model to simulate a H+VS protocol in normal Type B MVN neurons.  
298 We varied the onset of the hyperpolarising stimulus from -500 ms to +250 ms from the onset of  
299 the excitatory stimulus (Fig. 10A). In all cases, the amplitude of the hyperpolarising stimulus was  
300 475 pA, and the duration was 250 ms.

301 The dendritic  $[\text{Ca}^{2+}]$  response showed a marked dependence on the relative timing of the  
302 hyperpolarising and excitatory stimuli (Fig. 10B). A maximal elevation of  $[\text{Ca}^{2+}]$  was seen when  
303 the release of the membrane hyperpolarisation corresponded with the start of the VS stimulation.  
304 In contrast, dendritic  $[\text{Ca}^{2+}]$  was at its lowest when the onsets of hyperpolarising and excitatory  
305 stimuli coincided. Correspondingly, there is a narrow window of relative timings where strong and  
306 sustained AMPA receptor phosphorylation is observed (Fig. 10B, D), suggesting that the precise  
307 timing of hyperpolarisation and excitation is crucial for hyperpolarisation-gated synaptic plasticity.

## 308 **Discussion**

309 In this study we developed a detailed multi-scale model incorporating electrophysiological and  
310 biochemical processes that regulate AMPA-receptor phosphorylation in MVN neurons, to investigate  
311 the interactions between membrane hyperpolarisation and synaptic plasticity. The electrophysio-

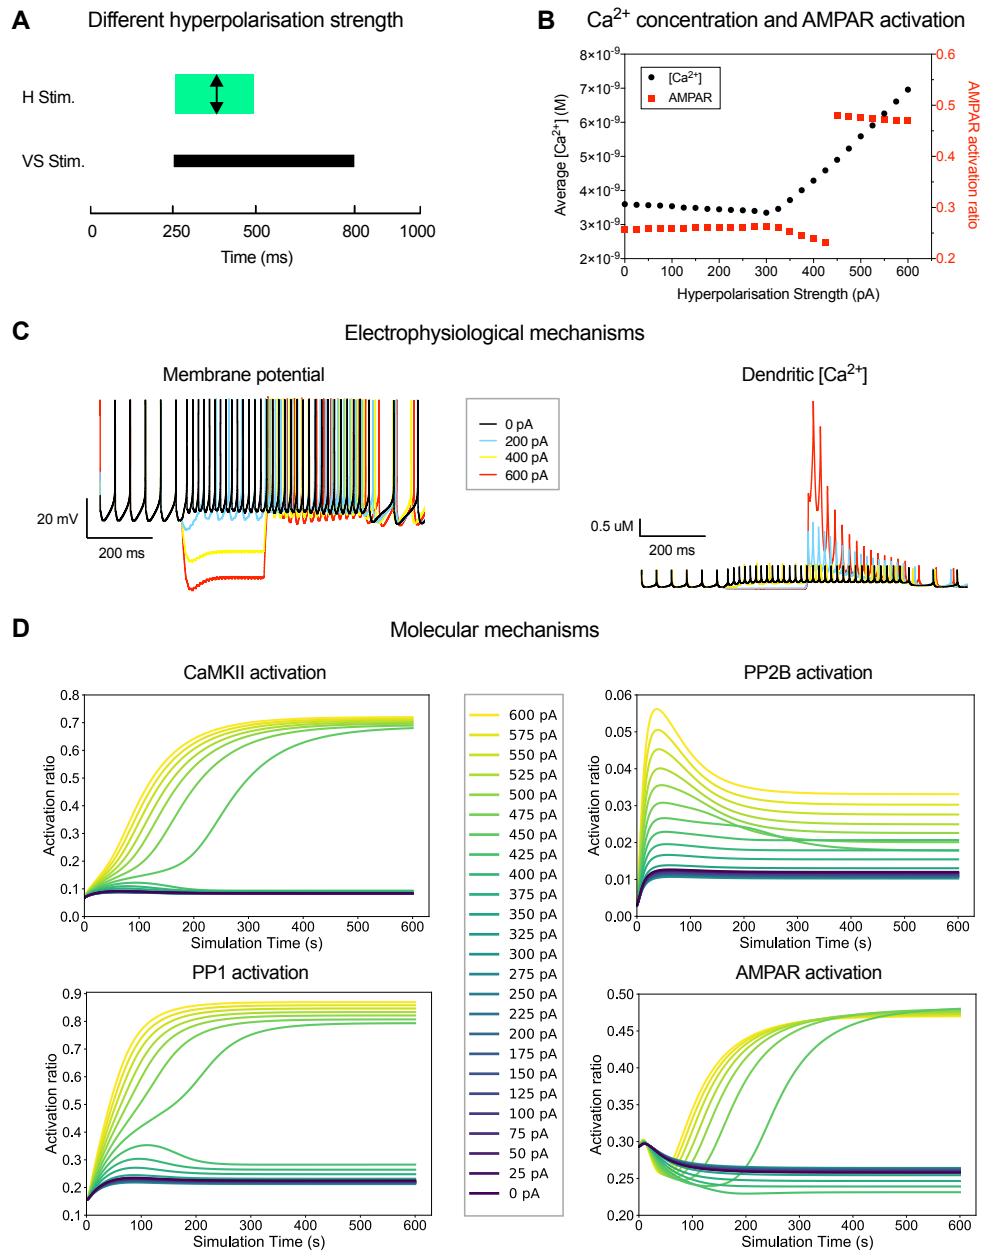

**Figure 8.** Effects of varying hyperpolarisation strength on AMPA receptor activation. **A.** Simulation set-up: Hyperpolarising stimuli of various strengths were applied to MVN type B neurons. **B.** AMPAR activation at the end of each 600 s simulation plotted as a function of average  $[\text{Ca}^{2+}]$  during the same simulation. **C.** Electrophysiological mechanisms (dynamics of the membrane potential and dendritic  $[\text{Ca}^{2+}]$ ) for selected hyperpolarisation strengths. **D.** Molecular changes (activation of kinases and phosphatases and AMPAR phosphorylation over time) for a range of hyperpolarisation strengths.

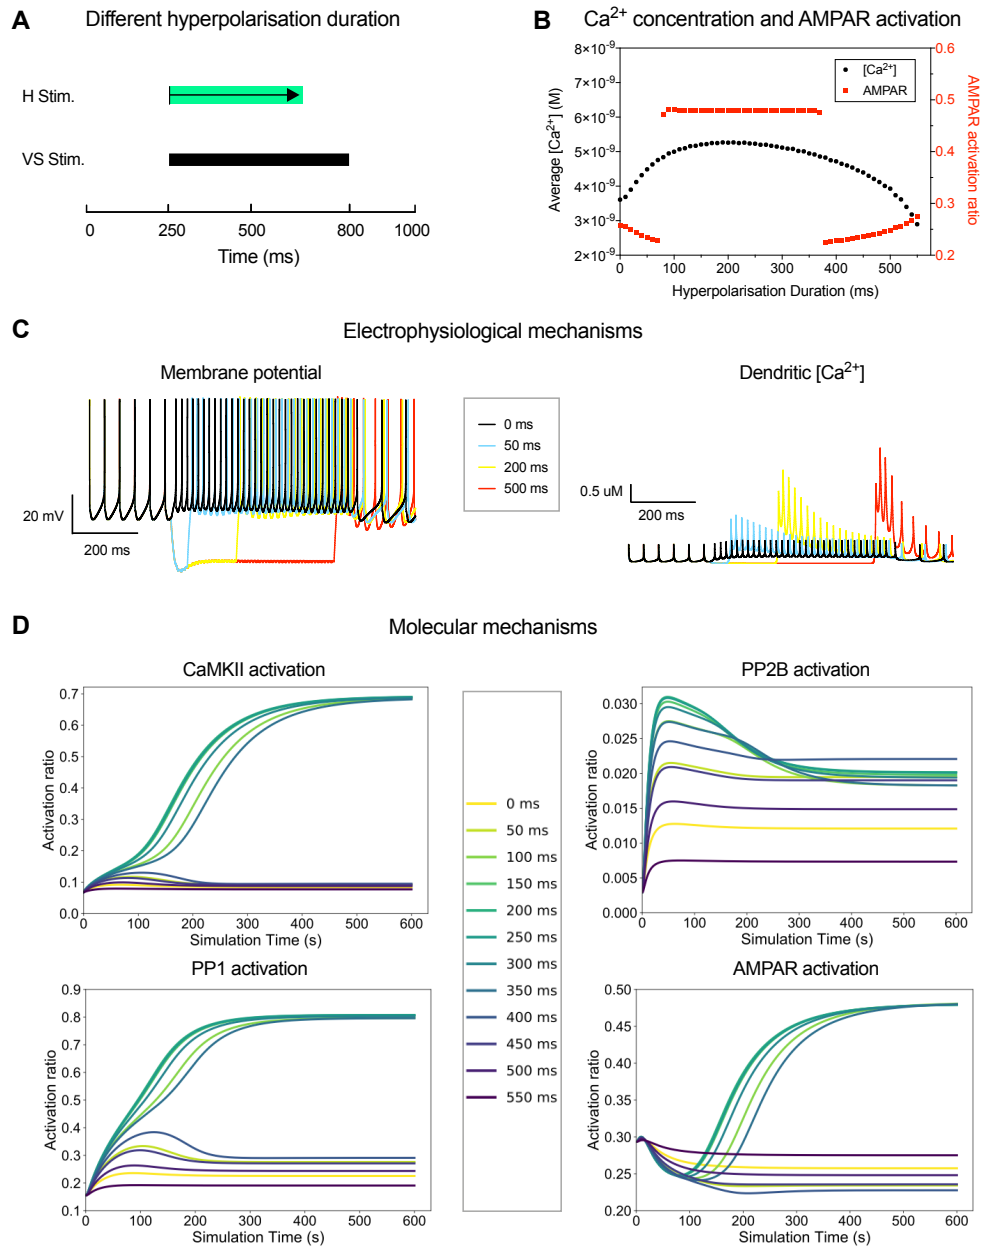

**Figure 9.** Effects of varying hyperpolarisation duration on AMPA receptor activation. **A.** Simulation set-up: Hyperpolarising stimuli of varying duration were applied to MVN type B neurons. **B.** AMPAR activation at the end of each 600 s simulation plotted as a function of average  $[\text{Ca}^{2+}]$  during the same simulation. **C.** Electrophysiological mechanisms (dynamics of the membrane potential and dendritic  $[\text{Ca}^{2+}]$ ) for selected hyperpolarisation durations. **D.** Molecular changes (activation of kinases and phosphatases and AMPAR phosphorylation over time) for a range of hyperpolarisation durations.

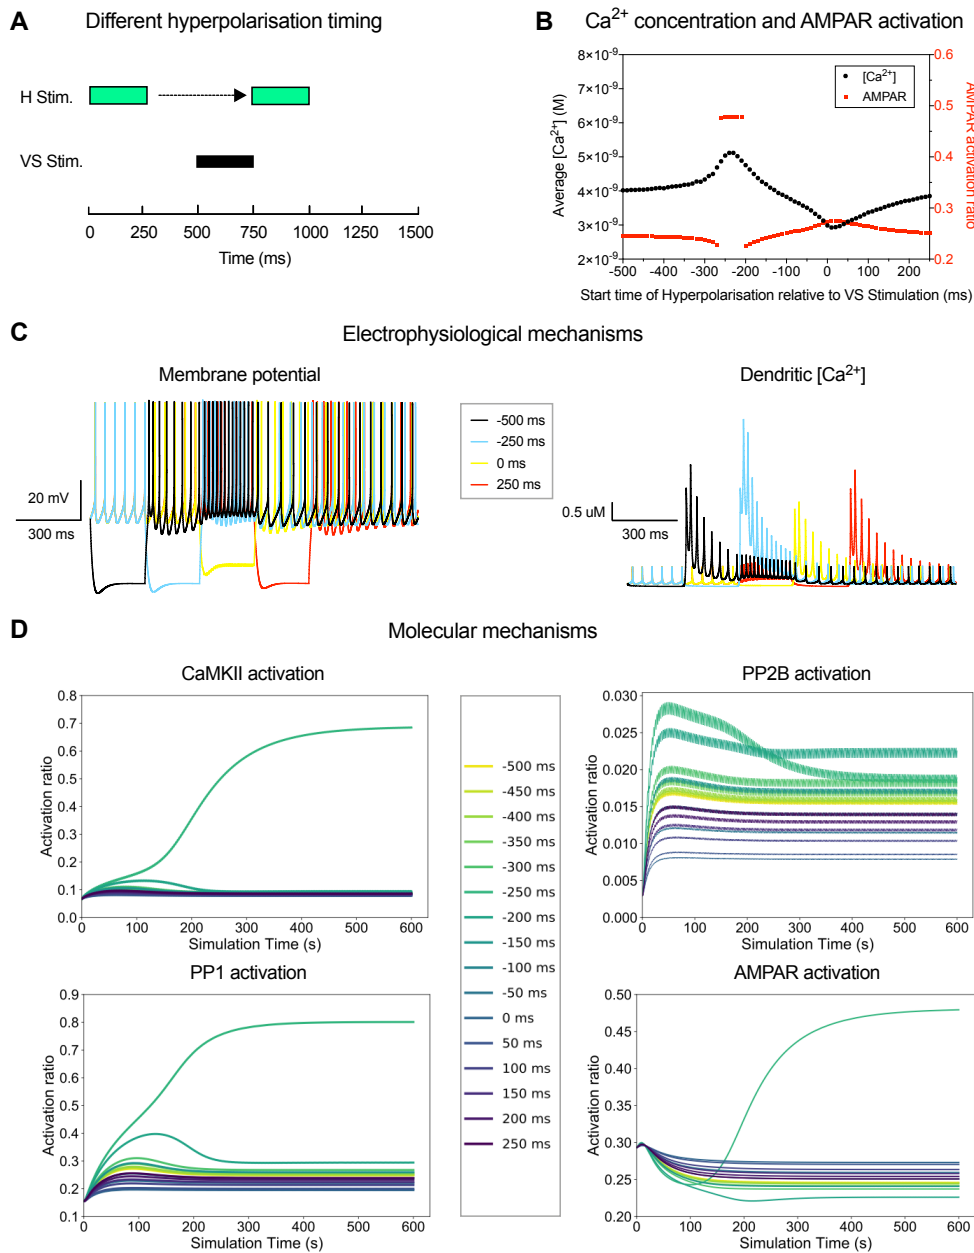

**Figure 10.** Effects of varying the timing between hyperpolarisation and excitation on AMPA receptor activation. **A.** Simulation set-up: Hyperpolarising and excitatory stimuli were applied at varying relative timing to MVN type B neurons. **B.** AMPAR activation at the end of each 600 s simulation plotted as a function of average  $[\text{Ca}^{2+}]$  during the same simulation. **C.** Electrophysiological mechanisms (dynamics of the membrane potential and dendritic  $[\text{Ca}^{2+}]$ ) for selected hyperpolarisation onset timings. **D.** Molecular changes (activation of kinases and phosphatases and AMPAR phosphorylation over time) for a range of hyperpolarisation onset timings.

312 logical component of the multi-scale model was based on well-established NEURON models which  
313 faithfully reproduce the membrane characteristics of rodent Type B MVN neurons in vitro (*Quadroni  
314 and Knopfel, 1994*). The biochemical component of the multi-scale model was based on models of  
315 calcium signalling and the activation of protein kinases and phosphatases in postsynaptic neuronal  
316 compartments (*Stefan et al., 2008; Li et al., 2012; Mattioni and Le Novère, 2013*). Dendritic  $\text{Ca}^{2+}$   
317 concentration profiles obtained from the NEURON model of the MVN neuron were routed to the  
318 biochemical component of the model. This allowed us to model changes in the phosphorylation ratio  
319 of AMPA receptors, as a proxy of long-term potentiation or depression of the activated synapses  
320 in a dendritic compartment of the MVN neuron.

321 The multi-scale model thus allowed us to examine for the first time the cellular and molecular  
322 mechanisms involved in hyperpolarisation-gated synaptic plasticity, where the synaptic strength  
323 of vestibular nerve afferent inputs in MVN neurons is regulated by inhibitory inputs presumably  
324 from Purkinje cell synapses (*McElvain et al., 2010*). Similar interactions are also seen in DCN  
325 neurons (*Pugh and Raman, 2009; Person and Raman, 2010*), suggesting that hyperpolarisation-  
326 gated synaptic plasticity is a fundamental mechanism in cerebellum-dependent motor learning.  
327 We used our model to specifically determine the effects on calcium signalling and AMPA receptor  
328 regulation induced by experimental protocols that cause either a potentiation or a depression of the  
329 vestibular synapses in MVN neurons (*McElvain et al., 2010*). During resting activity, dendritic  $\text{Ca}^{2+}$   
330 concentration showed small transients largely due to  $\text{Ca}^{2+}$  influx with each action potential through  
331 high-threshold  $\text{Ca}^{2+}$  channels, leading to low baseline levels of AMPA receptor phosphorylation. A  
332 train of synaptic stimulation at 100 Hz (VS stimulation protocol) has previously been shown to induce  
333 LTD in vestibular synapses (*McElvain et al., 2010*). In contrast, if the same train was accompanied  
334 by a period of hyperpolarisation (H+VS protocol), then this resulted in LTP (*McElvain et al., 2010*).  
335 Our model reproduced both effects, with VS stimulation alone causing only moderate increases in  
336 calcium concentration and a net decrease in AMPA receptor phosphorylation. In contrast, H+VS  
337 stimulation evoked larger elevations in calcium concentration, primarily due to the activation of  
338 low-voltage activated  $\text{Ca}^{2+}$  channels upon the release of hyperpolarisation. This led to a substantial  
339 increase in AMPA receptor phosphorylation. The role of low-voltage activated  $\text{Ca}^{2+}$  channels in  
340 mediating the high dendritic  $[\text{Ca}^{2+}]$  following periods of hyperpolarisation is in agreement with the  
341 finding of *Person and Raman (2010)* that the induction of hyperpolarisation-gated synaptic plasticity  
342 in DCN neurons is dependent on LVCa channel activation.

343 This hyperpolarisation-gated synaptic plasticity relies on the delicate balance between kinase  
344 and phosphatase activity in the post-synaptic dendrite. CaMKII and PP2B compete for activation by  
345 calcium-activated calmodulin, and their relevant concentrations are instrumental in determining  
346 whether LTP or LTD is induced. This is consistent with previous results (*Stefan et al., 2008; Li et al.,  
347 2012*). Further downstream, CaMKII and PP1 compete to determine the phosphorylation status  
348 both of AMPA receptors and of CaMKII itself. Their bi-stable behaviour determines the bi-stable  
349 response of AMPA receptor phosphorylation (*Zhabotinsky, 2000; Miller et al., 2005; Pi and Lisman,  
350 2008*). This means that the biochemical reaction system functions as a switch that can produce  
351 long-term potentiation or long-term depression in response to changes in calcium concentrations.  
352 Our present findings show how the electrophysiological activation of the MVN neuron by patterns  
353 of synaptic excitation coupled with inhibition, induces changes in dendritic calcium concentrations  
354 and drives the biochemical reaction system to bring about hyperpolarisation-gated plasticity at the  
355 vestibular nerve synapse.

356 The amount and direction of hyperpolarisation-gated synaptic plasticity are dependent in  
357 complex ways on the strength and duration of the hyperpolarising stimulus, as well as the relative  
358 timing between hyperpolarisation (inhibition) and excitation. Long-term potentiation is observed  
359 when hyperpolarisation is sufficiently strong, and when the release from hyperpolarisation coincides  
360 with an excitatory stimulus.

361 Our multi-scale simulation workflow uses the open source tools NEURON (*Carnevale and Hines,  
362 2006*) and COPASI (*Hoops et al., 2006*) that work with community-driven standards (NeuroML



363 (*Gleeson et al., 2010*) and SBML (*Hucka et al., 2003*). This provides a useful template for the  
364 development of further multi-scale models linking electrophysiological and biochemical models  
365 more generally. The modularity of our model means it can also be extended to include more  
366 components of the biochemical signalling pathways or a wider neuronal signalling network. It  
367 thus has the potential to address a wide range of questions about neural signal integration, post-  
368 synaptic biochemical reaction systems and plasticity. While our current model appears to contain  
369 the essential components required to express hyperpolarisation-gated synaptic plasticity, further  
370 developments are necessary to incorporate additional inputs to MVN neurons that modulate  
371 synaptic plasticity, and cellular mechanisms involved in the consolidation of synaptic plasticity  
372 through the regulation of gene expression, for example.

## 373 Methods

### 374 Biochemical model of signalling pathways underlying synaptic plasticity

375 The biochemical model used here is based on previous models of calcium signalling and the  
376 activation of protein kinases and phosphatases in postsynaptic compartments (*Stefan et al., 2008*;  
377 *Li et al., 2012*; *Mattioni and Le Novère, 2013*), starting from  $\text{Ca}^{2+}$  input and leading to AMPA receptor  
378 phosphorylation as a readout. Specifically, we have built on an earlier model by Li et. al (*Li et al.,*  
379 *2012*), which we helped encode in SBML format, and which is now available on BioModels Database  
380 (*Li et al., 2010*) (BIOMD0000000628). The model follows the basic SBGN reaction scheme introduced  
381 in Fig 1B. Accounting for the fact that several of the model components can exist in different  
382 functional states (*Stefan et al., 2014*) and modelling each of those states explicitly, there are a total  
383 of 129 molecular species and 678 reactions in the model. Initial concentrations of chemical species  
384 were taken from the model by *Li et al. (2012)*. Concentration of CaMKII was changed to  $1 \times 10^{-5}$  M  
385 for MVN neurons (*Biber et al., 1984*). Besides, we added the reaction:  $\text{CamR\_Ca2\_AC} + \text{PP2B} \rightarrow$   
386  $\text{CamR\_Ca2\_AC\_PP2B}$ , which is necessary for completeness, but was missing in the model by *Li*  
387 *et al. (2012)*. We also added PP2B activation to the model which was described in the paper by  
388 *Li et al. (2012)*, but was not included in their supplemental model file. For autophosphorylation  
389 of CaMKII, we used the polynomial formula used by *Li et al. (2012)* to compute phosphorylation  
390 rates, which accounts for the fact that autophosphorylation proceeds from one active subunit to its  
391 neighbour in the CaMKII holoenzyme. However, we slightly modified the rate formula to ensure  
392 that the autophosphorylation rate was always greater than 0, in order to be more biochemically  
393 accurate. At last, we removed  $\text{Ca}^{2+}$  buffer proteins from the system, because we already account  
394 for calcium buffering when translating between electrical and chemical models (see below).

395 Initial concentrations of chemical species were taken from previous literature based on rat  
396 brains (*Biber et al., 1984*; *Li et al., 2012*; *Mattioni and Le Novère, 2013*) and are presented in table  
397 1. Reaction rates and other parameters were as described by *Li et al. (2012)*.

**Table 1.** Initial concentration of molecular species in the biochemical model

| Name       | Concentration (M)     |
|------------|-----------------------|
| Calmodulin | $1.00 \times 10^{-4}$ |
| CaMKII     | $7.00 \times 10^{-5}$ |
| PP2Bi      | $6.00 \times 10^{-6}$ |
| DARPP-32   | $3.00 \times 10^{-6}$ |
| PKA        | $1.20 \times 10^{-8}$ |
| PP1a       | $2.00 \times 10^{-6}$ |
| AMPA_p     | $1.66 \times 10^{-7}$ |
| AMPA       | $1.49 \times 10^{-6}$ |

398 The biochemical model was edited and run in COPASI 4.16 (*Hoops et al., 2006*). It is available in  
399 the project's GitHub repository (<https://github.com/YubinXie/multiscale-synaptic-model>) in SBML  
400 level 2.4 (.xml) format.

### 401 **Simulation of Chemical model**

402 In order to observe concentration dynamics of key chemical species over time, the "Time Course"  
403 function in COPASI was used. We chose a time interval of 0.0001 s, and the "deterministic (LSODA)"  
404 method. The concentration of  $\text{Ca}^{2+}$  was either fixed throughout the time course, or altered using  
405 the "Events" functionality in COPASI in order to simulate a dynamic calcium signal (see below).

406 In order to explore equilibrium behaviours at different  $\text{Ca}^{2+}$  concentrations (Fig. 2), we used  
407 the "Parameter Scan" function in COPASI. Initial  $\text{Ca}^{2+}$  concentrations ranging from  $4 \times 10^{-10}$  M to  
408  $4 \times 10^{-7}$  M were scanned, with 151 logarithmic intervals. At each initial Ca concentration, the  
409 simulation started from the initial state of the biochemical model and was run for 1600 s with the  
410 time interval being 0.0001 s. This was long enough for the system to reach an equilibrium state. The  
411 value of  $\text{Ca}^{2+}$  concentration was fixed at initial value during the whole simulation.

### 412 **Electrical model of MVN type B neuron**

413 We used a multi-compartmental electrophysiological model of an MVN Type B neuron adapted from  
414 *Quadroni and Knopfel (1994)* and implemented (*Graham et al., 2009*) in NEURON (*Carnevale and*  
415 *Hines, 2006*). The model neuron consisted of a soma, 4 proximal dendrites and 8 distal dendrites,  
416 comprising 61 electrical compartments. Each compartment included up to nine active ionic channels  
417 (Table 2), and with the exception of the soma also included one excitatory vestibular nerve synapse  
418 containing by AMPA receptors and NMDA receptors. The strength of the vestibular nerve synapses  
419 was adjusted so that stimulation at a frequency of 100 Hz caused an increase in firing rate of the  
420 model MVN neuron similar to that observed experimentally by *McElvain et al. (2010)*.

421 We used the two canonical subtypes of Type B MVN neurons modelled by *Quadroni and Knopfel*  
422 *(1994)* in our simulations. The normal Type B MVN neuron, representing the majority of MVN  
423 neurons (*Straka et al., 2005*), expresses a moderate level of low-voltage activated  $\text{Ca}^{2+}$  channels  
424 (LVA channels, Table 2). By contrast the "Type B<sub>high\_LVA</sub>" neuron, normally representing some 10% of  
425 MVN neurons (*Serafin et al., 1991a; Him and Dutia, 2001*), expresses a higher level of LVA channels  
426 and shows a pronounced low-threshold rebound firing ("low-threshold  $\text{Ca}^{2+}$  spike") upon release  
427 from hyperpolarisation. While the models of *Quadroni and Knopfel (1994)* accurately replicate the  
428 electrophysiological properties of normal Type B and Type B<sub>high\_LVA</sub> neurons, it should be noted that  
429 the expression of LVA  $\text{Ca}^{2+}$  channels in MVN neurons and the incidence of post-hyperpolarisation  
430 rebound firing is heterogeneous (*Serafin et al., 1991a; Straka et al., 2005*). Indeed LVA channel  
431 expression in MVN neurons is rapidly upregulated after deafferentation, with the number of Type  
432 B<sub>high\_LVA</sub> neurons increasing significantly during vestibular compensation (*Him and Dutia, 2001;*  
433 *Straka et al., 2005*). In this light, to investigate the functional role of LVA channels in the present  
434 study, we also modelled a third, hypothetical "Type B<sub>low\_LVA</sub>" MVN neuron, where the LVA  $\text{Ca}^{2+}$   
435 channel density was reduced to 50% of that in normal Type B neurons (Table 2).

### 436 **Multi-scale interface and stimulation protocols**

437 We applied the stimulation protocols that have been shown experimentally to induce bidirectional  
438 plasticity of excitatory synapses in DCN and MVN neurons in vitro (*Person and Raman, 2010;*  
439 *McElvain et al., 2010*), to determine the evoked dendritic  $[\text{Ca}^{2+}]$  profiles and their effects on synaptic  
440 AMPA receptors in the multi-scale model. The vestibular synapses on the proximal and distal  
441 dendritic compartments of the MVN model were activated for 550 ms at a frequency of 100 Hz.  
442 Repeated periods of vestibular synaptic activation alone ("VS" protocol) have been shown to  
443 cause LTD of excitatory synapses in MVN neurons (*McElvain et al., 2010*). Alternatively, in the  
444 hyperpolarisation + vestibular synaptic activation protocol ("H+VS"), vestibular synaptic stimulation  
445 was paired with hyperpolarisation of the post-synaptic cell for 250 ms, by the injection of inhibitory

**Table 2.** Distribution and density of ionic conductances of MVN B neurons(Quadroni and Knopfel, 1994)

| Channels | Maximal conductance per membrane area ( $\mu\text{Scm}^{-2}$ ) |                    |                  |
|----------|----------------------------------------------------------------|--------------------|------------------|
|          | Soma                                                           | Proximal Dendrites | Distal Dendrites |
| Na       | 43000                                                          | 2880               | 0                |
| Nap      | 23.6                                                           | 38                 | 0                |
| H        | 66                                                             | 66                 | 0                |
| bK(fast) | 37530                                                          | 2572               | 640              |
| AHP      | 2716                                                           | 0                  | 0                |
| K(slow)  | 519                                                            | 406                | 0                |
| A        | 755                                                            | 0                  | 0                |
| Ca(HVA)  | 2385                                                           | 1417               | 350              |
| Ca(LVA)  | 166                                                            | 325.5/651/1607*    | 50               |
| Na(leak) | 37.8                                                           | 0.7                | 0.71             |
| Ca(leak) | 74.6                                                           | 1                  | 1                |
| K(leak)  | 166                                                            | 3.69               | 3.68             |

\*The values are for Type B<sub>low\_LVA</sub>, normal Type B, Type B<sub>high\_LVA</sub> MVN neurons, respectively.

446 current into all of the dendritic compartments. This pattern of stimulation was shown to induce LTP  
 447 of vestibular nerve synapses in MVN neurons (McElvain et al., 2010).

448 Values of  $[\text{Ca}^{2+}]$  in the mid-proximal dendrites during the normal resting activity of the MVN  
 449 neuron and in response to the VS and H+VS stimulation protocols were obtained from NEURON, and  
 450 used as the input to the biochemical model in COPASI. The  $[\text{Ca}^{2+}]$  values obtained from NEURON  
 451 were scaled down by a factor of 50, to account for Ca buffering and sequestration processes not  
 452 explicitly included in our biochemical model (Fig.11).

453 This scaling factor brought the  $[\text{Ca}^{2+}]$  values calculated in NEURON into the physiological range of  
 454 intracellular  $\text{Ca}^{2+}$  concentration known from experimental studies (Sharma et al., 1995). In addition,  
 455 the chemical model has a much lower time resolution than the electrical model, with a simulation  
 456 time step of 1 ms vs. 0.025 ms in the electrical model. We therefore calculated the average of 40  
 457 successive values of  $[\text{Ca}^{2+}]$  in the NEURON model, to provide the COPASI model with an input value  
 458 of  $[\text{Ca}^{2+}]$  at every 1 ms time step (Fig.11). After  $[\text{Ca}^{2+}]$  scaling and time resolution transformation,  
 459 the resulting  $[\text{Ca}^{2+}]$  values was added to the COPASI input file as an "Event". Then, the biochemical

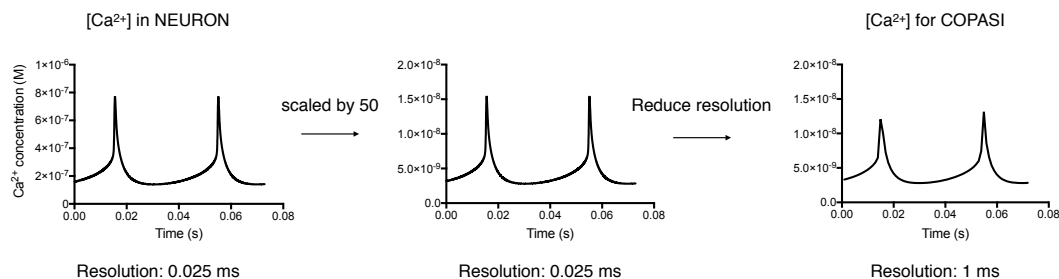

**Figure 11.** Demonstration of  $[\text{Ca}^{2+}]$  conversion from electrical modelling tool NEURON to biochemistry modelling tool COPASI. Firstly, the  $[\text{Ca}^{2+}]$  values obtained from NEURON were scaled down by a factor of 50, to account for  $\text{Ca}^{2+}$  buffering and sequestration processes not explicitly included in our biochemical model. Then, the time resolution was scaled up by a factor of 40, given the relatively slower dynamics in biochemistry system when compared to the electrical system.

460 model could be run in COPASI. All the process was automatically done by a Python script (provided  
461 here: <https://github.com/YubinXie/multiscale-synaptic-model>). One thing to note is that, before  
462 adding the stimulation events into COPASI model, the COPASI model should run for 1000 s with  
463 the  $\text{Ca}^{2+}$  being the average  $\text{Ca}^{2+}$  of the corresponding (Type B, Type  $B_{\text{low\_LVA}}$ , Type  $B_{\text{high\_LVA}}$ ) resting  
464 neurons.

465 **Regular H + VS simulation protocol** (Fig. 3, 5, 4, 6): In a 1000 ms window, 100Hz 550 ms VS  
466 stimuli starts at 250 ms and ends at 800 ms. 475 pA inhibitory stimuli (hyperpolarisation) starts at  
467 250 ms and ends at 500 ms. This 1000 ms simulation is constantly repeated until the simulation  
468 ends (360 s). Inhibitory stimuli of 475 pA on Type  $B_{\text{high\_LVA}}$  neurons gave a huge  $[\text{Ca}^{2+}]$  rebound,  
469 which is too huge to be visualized in a reader-friendly way. In Fig. 5, 6, 320 pA inhibitory stimuli was  
470 used in Type  $B_{\text{high\_LVA}}$  neurons.

471 **Hyperpolarisation strength simulation protocol** (Fig. 8): In a 1000 ms window, a 100 Hz  
472 550 ms VS stimulus starts at 250 ms and ends at 800 ms. Inhibitory stimulus (hyperpolarisation)  
473 with strength from 0 pA to 600 pA starts at 250 ms and ends at 500 ms. This 1000 ms window is  
474 constantly repeated until the simulation ends (600 s).

475 **Hyperpolarisation duration simulation protocol** (Fig. 9): In a 1000 ms window, 100 Hz, a  
476 550 ms VS stimulus starts at 250 ms and ends at 800 ms. A 475 pA inhibitory stimulus (hyperpo-  
477 larisation) with duration from 0 ms to 550 ms starts at the same time. This 1000 ms window is  
478 constantly repeated until the simulation ends (600 s).

479 **Hyperpolarisation timing simulation protocol** (Fig. 10): To allow a large range of timing  
480 scanning, here we used a 1500 ms time window. In this window, a 100 Hz 250 ms VS stimulus starts  
481 at 250 ms and ends at 500 ms. A 250 ms inhibitory stimulus (hyperpolarisation) with strength 475 pA  
482 starts ranging from 500 ms earlier to 250 ms later than the VS stimulus. This 1500 ms simulation is  
483 constantly repeated until the simulation ends (600 s).

484 Individual simulations were run on standard desktop and laptop computers. Sets of simulations  
485 for figures 8 to 10 were run on the Eddie Compute Cluster at the University of Edinburgh.

## 486 **Reproducibility**

487 All the models and necessary scripts that were used in this paper can be found in the following  
488 GitHub repository: <https://github.com/YubinXie/multiscale-synaptic-model>. Detailed guides are  
489 provided to reproduce all the figures.

## 490 **Acknowledgements**

491 The authors thank Nicolas Le Novère for the discussion on the System Biology Graphical Notation  
492 form of biochemical model schematic. We thank Lu Li, Pinar Pir, and Varun B. Kothamachu for the  
493 discussion and inputs on the System Biology Markup Language version of the biochemical model.  
494 We also thank Sven Sahle for discussions on the COPASI software.

## 495 **References**

- 496 **Anzai M**, Kitazawa H, Nagao S. Effects of reversible pharmacological shutdown of cerebellar flocculus on the  
497 memory of long-term horizontal vestibulo-ocular reflex adaptation in monkeys. *Neuroscience Research*. 2010;  
498 68(3):191–198. doi: 10.1016/j.neures.2010.07.2038.
- 499 **Biber A**, Schmid G, Hempel K. Calmodulin content in specific brain areas. *Experimental Brain Research*. 1984;  
500 56(2):323–326. doi: 10.1007/BF00236287.
- 501 **Blazquez PM**, Hirata Y, Highstein SM. The vestibulo-ocular reflex as a model system for motor learning: what is  
502 the role of the cerebellum? *The Cerebellum*. 2004; 3(3):188–192.
- 503 **Bloss EB**, Cembrowski MS, Karsh B, Colonell J, Fetter RD, Spruston N. Structured dendritic inhibition supports  
504 branch-selective integration in CA1 pyramidal cells. *Neuron*. 2016; 89(5):1016–1030.
- 505 **Boyden ES**, Katoh A, Raymond JL. Cerebellum-dependent learning: the role of multiple plasticity mechanisms.  
506 *Annual review of neuroscience*. 2004; 27:581–609. <http://www.ncbi.nlm.nih.gov/pubmed/15217344>, doi:  
507 10.1146/annurev.neuro.27.070203.144238.

- 508 **Brock LG**, Coombs JS, Eccles JC. The recording of potentials from motoneurons with an intracellular electrode.  
509 The Journal of physiology. 1952 aug; 117(4):431–60. <http://www.ncbi.nlm.nih.gov/pubmed/12991232>.
- 510 **Broussard DM**, Titley HK, Antflick J, Hampson DR. Motor learning in the VOR: the cerebellar component.  
511 Experimental brain research. 2011; 210(3-4):451–463.
- 512 **Carcaud J**, de Barros FF, Idoux E, Eugène D, Reveret L, Moore LE, Vidal PP, Beraneck M. Long-lasting visuo-  
513 vestibular mismatch in freely-behaving mouse reduces the vestibulo-ocular reflex and leads to neural changes  
514 in the direct vestibular pathway. Eneuro. 2017; 4(February):ENEURO.0290–16.2017. <http://eneuro.sfn.org/lookup/doi/10.1523/ENEURO.0290-16.2017>, doi: 10.1523/ENEURO.0290-16.2017.
- 516 **Carnevale NT**, Hines ML. The NEURON Book. Neuron. 2006; 30(2):457. <http://books.google.com/books?hl=en&lr=&id=YzcOyjKBPHgC&oi=fnd&pg=PA1&dq=The+Neuron+Book&ots=Ki6EKu{ }ZLd{&sig=3Cd1R026GoleT59HkXyV-xHm7Yo>, doi: 10.1017/CBO9780511541612.
- 519 **Clopath C**, Badura A, De Zeeuw CI, Brunel N. A Cerebellar Learning Model of Vestibulo-Ocular Reflex Adaptation  
520 in Wild-Type and Mutant Mice. Journal of Neuroscience. 2014; 34(21):7203–7215. <http://www.jneurosci.org/cgi/doi/10.1523/JNEUROSCI.2791-13.2014>, doi: 10.1523/JNEUROSCI.2791-13.2014.
- 522 **Doron M**, Chindemi G, Muller E, Markram H, Segev I. Timed Synaptic Inhibition Shapes NMDA Spikes, Influencing  
523 Local Dendritic Processing and Global I/O Properties of Cortical Neurons. Cell reports. 2017; 21(6):1550–1561.
- 524 **Engbers JDT**, Anderson D, Zamponi GW, Turner RW. Signal processing by T-type calcium channel in-  
525 teractions in the cerebellum. Frontiers in cellular neuroscience. 2013; 7(November):230. <http://www.pubmedcentral.nih.gov/articlerender.fcgi?artid=3841819&tool=pmcentrez&rendertype=abstract>, doi:  
526 10.3389/fncel.2013.00230.  
527
- 528 **Gidon A**, Segev I. Principles governing the operation of synaptic inhibition in dendrites. Neuron. 2012; 75(2):330–  
529 341.
- 530 **Gleeson P**, Crook S, Cannon RC, Hines ML, Billings GO, Farinella M, Morse TM, Davison AP, Ray S, Bhalla US,  
531 Barnes SR, Dimitrova YD, Silver RA. NeuroML: A language for describing data driven models of neurons  
532 and networks with a high degree of biological detail. PLoS Computational Biology. 2010; 6(6):1–19. doi:  
533 10.1371/journal.pcbi.1000815.
- 534 **Graham BP**, Menzies JR, Dutia MB. Model of hyperpolarization dependent LTD in MVN neurons. BMC Neuro-  
535 science. 2009 Jul; 10(1):P205. <https://doi.org/10.1186/1471-2202-10-S1-P205>, doi: 10.1186/1471-2202-10-S1-  
536 P205.
- 537 **Him A**, Dutia MB. Intrinsic excitability changes in vestibular nucleus neurons after unilateral deafferentation.  
538 Brain Research. 2001; 908(1):58–66. doi: 10.1016/S0006-8993(01)02600-2.
- 539 **Hoops S**, Gauges R, Lee C, Pahle J, Simus N, Singhal M, Xu L, Mendes P, Kummer U. COPASI - A Complex Pathway  
540 Simulator. Bioinformatics. 2006; 22(24):3067–3074. doi: 10.1093/bioinformatics/btl485.
- 541 **Hucka M**, Finney A, Sauro HM, Bolouri H, Doyle JC, Kitano H, Arkin AP, Bornstein BJ, Bray D, Cornish-Bowden A,  
542 Cuellar AA, Dronov S, Gilles ED, Ginkel M, Gor V, Goryanin II, Hedley WJ, Hodgman TC, Hofmeyr JH, Hunter  
543 PJ, et al. The systems biology markup language (SBML): A medium for representation and exchange of  
544 biochemical network models. Bioinformatics. 2003; 19(4):524–531. doi: 10.1093/bioinformatics/btg015.
- 545 **Hull C**. Cellular and Synaptic Properties of Local Inhibitory Circuits. Cold Spring Harbor protocols. 2017 may;  
546 2017(5):pdb.top095281. <http://www.ncbi.nlm.nih.gov/pubmed/28461682>, doi: 10.1101/pdb.top095281.
- 547 **Isaacson JS**, Scanziani M, How inhibition shapes cortical activity; 2011. doi: 10.1016/j.neuron.2011.09.027.
- 548 **Ito M**. Cerebellar control of the vestibulo-ocular reflex—around the flocculus hypothesis. Annual review of  
549 neuroscience. 1982; 5(1):275–297.
- 550 **Ito M**. Historical Review of the Significance of the Cerebellum and the Role of Purkinje Cells in Motor Learning.  
551 Annals of the New York Academy of Sciences. 2002 dec; 978(1 THE CEREBELLUM):273–288. <http://doi.wiley.com/10.1111/j.1749-6632.2002.tb07574.x>, doi: 10.1111/j.1749-6632.2002.tb07574.x.
- 553 **Johnston AR**, MacLeod NK, Dutia MB. Ionic conductances contributing to spike repolarization and after-  
554 potentials in rat medial vestibular nucleus neurones. The Journal of physiology. 1994 Nov; 481 ( Pt 1):61–77.
- 555 **Kassardjian CD**, Tan YF, Chung JYJ, Heskin R, Peterson MJ, Broussard DM. The site of a motor memory shifts  
556 with consolidation. Journal of Neuroscience. 2005; 25(35):7979–7985.

- 557 **du Lac S**, Raymond JL, Sejnowski TJ, Lisberger SG. Learning and memory in the vestibulo-ocular reflex. Annual  
558 review of neuroscience. 1995; 18(3 Pt 1):409–441. doi: [10.1146/annurev.ne.18.030195.002205](https://doi.org/10.1146/annurev.ne.18.030195.002205).
- 559 **Le Novère N**, Hucka M, Mi H, Moodie S, Schreiber F, Sorokin A, Demir E, Wegner K, Aladjem MI, Wimalaratne  
560 SM, Bergman FT, Gauges R, Ghazal P, Kawaji H, Li L, Matsuoka Y, Villéger A, Boyd SE, Calzone L, Courtot M,  
561 et al. The Systems Biology Graphical Notation. Nat Biotechnol. 2009 Aug; 27(8):735–741. [http://dx.doi.org/10.](http://dx.doi.org/10.1038/nbt.1558)  
562 [1038/nbt.1558](https://doi.org/10.1038/nbt.1558), doi: [10.1038/nbt.1558](https://doi.org/10.1038/nbt.1558).
- 563 **Li C**, Donizelli M, Rodriguez N, Dharuri H, Endler L, Chelliah V, Li L, He E, Henry A, Stefan MI, Snoep JL, Hucka M,  
564 Le Novère N, Laibe C. BioModels Database: An enhanced, curated and annotated resource for published  
565 quantitative kinetic models. BMC Systems Biology. 2010; 4(1):92. [http://bmcsystbiol.biomedcentral.com/](http://bmcsystbiol.biomedcentral.com/articles/10.1186/1752-0509-4-92)  
566 [articles/10.1186/1752-0509-4-92](https://doi.org/10.1186/1752-0509-4-92), doi: [10.1186/1752-0509-4-92](https://doi.org/10.1186/1752-0509-4-92).
- 567 **Li L**, Stefan MI, Le Novère N. Calcium Input Frequency, Duration and Amplitude Differentially Modulate the  
568 Relative Activation of Calcineurin and CaMKII. PLoS ONE. 2012; 7(9):e43810. [http://dx.plos.org/10.1371/](http://dx.plos.org/10.1371/journal.pone.0043810)  
569 [journal.pone.0043810](https://doi.org/10.1371/journal.pone.0043810), doi: [10.1371/journal.pone.0043810](https://doi.org/10.1371/journal.pone.0043810).
- 570 **Lisman J**. A mechanism for the Hebb and the anti-Hebb processes underlying learning and memory. Pro-  
571 ceedings of the National Academy of Sciences of the United States of America. 1989; 86(23):9574–9578. doi:  
572 [10.1073/pnas.86.23.9574](https://doi.org/10.1073/pnas.86.23.9574).
- 573 **Malenka RC**. Synaptic plasticity in the hippocampus: LTP and LTD. Cell. 1994 Aug; 78(4):535–538.
- 574 **Matsuno H**, Kudoh M, Watakabe A, Yamamori T, Shigemoto R, Nagao S. Distribution and Structure of Synapses  
575 on Medial Vestibular Nuclear Neurons Targeted by Cerebellar Flocculus Purkinje Cells and Vestibular Nerve in  
576 Mice: Light and Electron Microscopy Studies. PLOS ONE. 2016 oct; 11(10):e0164037. [http://dx.plos.org/10.](http://dx.plos.org/10.1371/journal.pone.0164037)  
577 [1371/journal.pone.0164037](https://doi.org/10.1371/journal.pone.0164037), doi: [10.1371/journal.pone.0164037](https://doi.org/10.1371/journal.pone.0164037).
- 578 **Mattioni M**, Le Novère N. Integration of biochemical and electrical signaling-multiscale model of the medium  
579 spiny neuron of the striatum. PloS one. 2013; 8(7):e66811. [http://journals.plos.org/plosone/article?id=10.](http://journals.plos.org/plosone/article?id=10.1371/journal.pone.0066811)  
580 [1371/journal.pone.0066811](https://doi.org/10.1371/journal.pone.0066811), doi: [10.1371/journal.pone.0066811](https://doi.org/10.1371/journal.pone.0066811).
- 581 **McElvain LE**, Bagnall MW, Sakatos A, du Lac S. Bidirectional plasticity gated by hyperpolarization controls  
582 the gain of postsynaptic firing responses at central vestibular nerve synapses. Neuron. 2010; 68(4):763–75.  
583 <http://www.sciencedirect.com/science/article/pii/S0896627310007671>, doi: [10.1016/j.neuron.2010.09.025](https://doi.org/10.1016/j.neuron.2010.09.025).
- 584 **Medina JF**. A Recipe for Bidirectional Motor Learning: Using Inhibition to Cook Plasticity in the Vestibular  
585 Nuclei. Neuron. 2010; 68(4):607–609. <http://linkinghub.elsevier.com/retrieve/pii/S089662731000927X>, doi:  
586 [10.1016/j.neuron.2010.11.011](https://doi.org/10.1016/j.neuron.2010.11.011).
- 587 **Menzies JR**, Porrill J, Dutia M, Dean P. Synaptic plasticity in medial vestibular nucleus neurons: comparison with  
588 computational requirements of VOR adaptation. PloS one. 2010; 5(10):e13182.
- 589 **Miller P**, Zhabotinsky AM, Lisman JE, Wang XJ. The stability of a stochastic CaMKII switch: Dependence  
590 on the number of enzyme molecules and protein turnover. PLoS Biology. 2005; 3(4):0705–0717. doi:  
591 [10.1371/journal.pbio.0030107](https://doi.org/10.1371/journal.pbio.0030107).
- 592 **Nagao S**, Kitazawa H. Effects of reversible shutdown of the monkey flocculus on the retention of adaptation of  
593 the horizontal vestibulo-ocular reflex. Neuroscience. 2003; 118(2):563–570.
- 594 **Person AL**, Raman IM. Deactivation of I-type ca current by inhibition controls ltp at excitatory synapses in the  
595 cerebellar nuclei. Neuron. 2010; 66(4):550–559. doi: [10.1016/j.neuron.2010.04.024](https://doi.org/10.1016/j.neuron.2010.04.024).
- 596 **Pi HJ**, Lisman JE. Coupled Phosphatase and Kinase Switches Produce the Tristability Required for Long-Term  
597 Potentiation and Long-Term Depression. Journal of Neuroscience. 2008; 28(49):13132–13138. [http://www.](http://www.jneurosci.org/cgi/doi/10.1523/JNEUROSCI.2348-08.2008)  
598 [jneurosci.org/cgi/doi/10.1523/JNEUROSCI.2348-08.2008](https://doi.org/10.1523/JNEUROSCI.2348-08.2008), doi: [10.1523/JNEUROSCI.2348-08.2008](https://doi.org/10.1523/JNEUROSCI.2348-08.2008).
- 599 **Porrill J**, Dean P. Cerebellar motor learning: when is cortical plasticity not enough? PLoS computational biology.  
600 2007; 3(10):e197.
- 601 **Pugh JR**, Raman IM, Nothing can be coincidence: synaptic inhibition and plasticity in the cerebellar nuclei; 2009.  
602 doi: [10.1016/j.tins.2008.12.001](https://doi.org/10.1016/j.tins.2008.12.001).
- 603 **Quadroni R**, Knopfel T. Compartmental models of type a and type b guinea pig medial vestibular neurons.  
604 Journal of Neurophysiology. 1994; 72(4):1911–1924.

- 605 **Raymond JL**, Lisberger SG. Neural learning rules for the vestibulo-ocular reflex. *The Journal of neuroscience* :  
606 the official journal of the Society for Neuroscience. 1998; 18(21):9112–9129.
- 607 **Serafin M**, de Waele C, Khateb A, Vidal PP, Mühlethaler M. Medial vestibular nucleus in the guinea-pig - I.  
608 Intrinsic membrane properties in brainstem slices. *Experimental Brain Research*. 1991; 84(2):417–425. doi:  
609 10.1007/BF00231464.
- 610 **Serafin M**, de Waele C, Khateb A, Vidal PP, Mühlethaler M. Medial vestibular nucleus in the guinea-pig - II.  
611 Ionic basis of the intrinsic membrane properties in brainstem slices. *Experimental Brain Research*. 1991;  
612 84(2):426–433. doi: 10.1007/BF00231465.
- 613 **Sharma RV**, Chapleau MW, Hajduczuk G, Wachtel RE, Waite LJ, Bhalla RC, Abboud FM. Mechanical stimulation  
614 increases intracellular calcium concentration in nodose sensory neurons. *Neuroscience*. 1995 May; 66:433–  
615 441.
- 616 **Shin SL**, Zhao GQ, Raymond JL. Signals and learning rules guiding oculomotor plasticity. *Journal of Neuroscience*.  
617 2014; 34(32):10635–10644.
- 618 **Shutoh F**, Ohki M, Kitazawa H, Itohara S, Nagao S. Memory trace of motor learning shifts transsynap-  
619 tically from cerebellar cortex to nuclei for consolidation. *Neuroscience*. 2006; 139(2):767–777. doi:  
620 10.1016/j.neuroscience.2005.12.035.
- 621 **Stefan MI**, Bartol TM, Sejnowski TJ, Kennedy MB. Multi-state Modeling of Biomolecules. *PLoS Comput Biol*. 2014  
622 Sep; 10(9):e1003844. <http://dx.doi.org/10.1371/journal.pcbi.1003844>, doi: 10.1371/journal.pcbi.1003844.
- 623 **Stefan MI**, Edelstein SJ, Novere NL. An allosteric model of calmodulin explains differential activation of  
624 PP2B and CaMKII. *Proceedings of the National Academy of Sciences*. 2008; 105(31):10768–10773. doi:  
625 10.1073/pnas.0804672105.
- 626 **Straka H**, Vibert N, Vidal PP, Moore LE, Dutia MB. Intrinsic membrane properties of vertebrate vestibular neurons:  
627 Function, development and plasticity; 2005. doi: 10.1016/j.pneurobio.2005.10.002.
- 628 **Wulff P**, Schonewille M, Renzi M, Viltono L, Sassoè-Pognetto M, Badura A, Gao Z, Hoebeek FE, van Dorp S, Wisden  
629 W, Farrant M, De Zeeuw CI. Synaptic inhibition of Purkinje cells mediates consolidation of vestibulo-cerebellar  
630 motor learning. *Nature Neuroscience*. 2009 aug; 12(8):1042–1049. [http://www.nature.com/doi/10.1038/](http://www.nature.com/doi/10.1038/nn.2348)  
631 [nn.2348](http://www.nature.com/doi/10.1038/nn.2348), doi: 10.1038/nn.2348.
- 632 **Yakusheva TA**, Shaikh AG, Green AM, Blazquez PM, Dickman JD, Angelaki DE. Purkinje Cells in Posterior  
633 Cerebellar Vermis Encode Motion in an Inertial Reference Frame. *Neuron*. 2007; 54(6):973–985. doi:  
634 10.1016/j.neuron.2007.06.003.
- 635 **Zhabotinsky AM**. Bistability in the Ca(2+)/calmodulin-dependent protein kinase- phosphatase system. *Biophys*  
636 *J*. 2000; 79(5):2211—21. [http://www.ncbi.nlm.nih.gov/cgi-bin/Entrez/referer?http://www.biophysj.org/cgi/](http://www.ncbi.nlm.nih.gov/cgi-bin/Entrez/referer?http://www.biophysj.org/cgi/content/abstract/79/5/2211)  
637 [content/abstract/79/5/2211](http://www.ncbi.nlm.nih.gov/cgi-bin/Entrez/referer?http://www.biophysj.org/cgi/content/abstract/79/5/2211).

638 **Appendix 1**

639 **Calmodulin affects AMPAR phosphorylation behaviours**

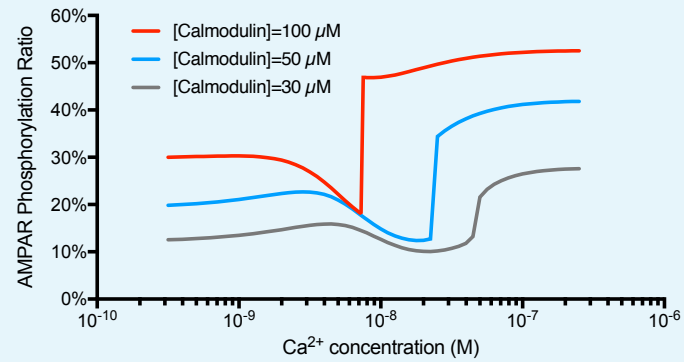

640

641

642

644

**Appendix 1 Figure 1.** The relationship between AMPAR phosphorylation ratio and Ca<sup>2+</sup> concentration when calmodulin being 100 μM, 50 μM, 30 μM. A higher concentration of calmodulin gives a faster and stronger switch-like behaviour of AMPAR phosphorylation when the calcium concentration increases.
